## **Resolving Rapid Radiations Within Families Using Anchored Phylogenomics**

5            **Étienne Léveillé-Bourret<sup>1,\*</sup>, Julian R. Starr<sup>1</sup>, Bruce A. Ford<sup>2</sup>, Emily Moriarty  
                 Lemmon<sup>3</sup>, Alan R. Lemmon<sup>4</sup>**

<sup>1</sup>*Department of Biology, University of Ottawa, K1N 6N5, Ottawa, Ontario, Canada.*

<sup>2</sup>*Department of Biological Sciences, University of Manitoba, R3T 2N2, Winnipeg,  
Manitoba, Canada.*

10            <sup>3</sup>*Department of Biological Science, Florida State University, Tallahassee, Florida 32306,  
United States.*

<sup>4</sup>*Department of Scientific Computing, Florida State University, Tallahassee, Florida 32306,  
United States.*

*\*Corresponding author. E-mail: [eleve060@uottawa.ca](mailto:eleve060@uottawa.ca)*

15

*Abstract.* – Despite the promise that molecular data would provide a seemingly unlimited source of independent characters, many plant phylogenetic studies are based on only two regions, the plastid genome and nuclear ribosomal DNA (nrDNA). Their popularity can be explained by high copy numbers and universal PCR primers that make their sequences easily amplified and converted into parallel datasets. Unfortunately, their utility is limited by linked loci and limited characters resulting in low confidence in the accuracy of phylogenetic estimates, especially when rapid radiations occur. In another contribution on anchored phylogenomics in angiosperms, we presented flowering plant-specific anchored enrichment probes for hundreds of conserved nuclear genes and demonstrated their use at the level of all angiosperms. In this contribution, we focus on a common problem in phylogenetic reconstructions below the family level: weak or unresolved backbone due to rapid radiations ( $\leq 10$  million years) followed by long divergence, using the Cariceae-Dulichieae-Scirpeae clade (CDS, Cyperaceae) as a test case. By comparing our nuclear matrix of 461 genes to a typical Sanger-sequence dataset consisting of a few plastid genes (matK, ndhF) and an nrDNA marker (ETS), we demonstrate that our nuclear data is fully compatible with the Sanger dataset and resolves short backbone internodes with high support in both concatenated and coalescence-based analyses. In addition, we show that nuclear gene tree incongruence is inversely proportional to phylogenetic information content, indicating that incongruence is mostly due to gene tree estimation error. This suggests that large numbers of conserved nuclear loci could produce more accurate trees than sampling rapidly evolving regions prone to saturation and long-branch attraction. The robust phylogenetic estimates obtained here, and high congruence with previous morphological and molecular analyses, are strong evidence for a complete tribal revision of CDS. The anchored hybrid enrichment probes used in this study should be similarly effective in other flowering plant groups. [*Carex*, coalescent based species

*Léveillé-Bourret et al. 2016*

*Anchored phylogenomics resolves plant radiation*

tree, flowering plants, low-copy nuclear genes, low-level phylogenetics, universal hybrid

40 enrichment probes]

One of the strongest arguments for the use of molecular data in phylogenetic reconstruction was that it provided a seemingly unlimited source of independent characters (Hillis 1987; Hillis and Wiens 2000; Scotland et al. 2003). Although sound in theory, most plant phylogenetic studies are still limited to just two regions, the plastid genome and the nuclear ribosomal DNA (nrDNA; Hughes et al. 2006 ) region. These regions are widely used because they are easily amplified due to high copy numbers (Álvarez and Wendel 2003) and the availability of universal PCR primers for many of their loci (e.g. White et al. 1990; Taberlet et al. 1991; Baldwin 1992). These regions are also particularly attractive for phylogenetic research because they consist of coding and non-coding loci which evolve at different rates (White et al. 1990; Wicke and Schneeweiss 2015), and they can be used in combination to study processes such as hybridization (Rieseberg et al. 1990; Feliner and Rosselló 2007).

Accessing other sources of molecular characters in plants has not been easy. Although the mitochondrial genome should be a prime source of characters due to high copy numbers, low sequence variation, major structural rearrangements and frequent lateral gene transfer has rendered its sequences impractical for most applications (Palmer and Herbon 1988; Knoop 2004; Bergthorsson et al. 2003; Richardson and Palmer 2006). The plant nuclear genome is equally problematic. Its vast size (63.4–700,000 Mbp; Greilhuber et al. 2006; Pellicer et al. 2010), independent genealogical histories and biparental inheritance are favourable characteristics; however, its generally higher evolutionary rates, low copy numbers and the scarcity of complete model genomes means that designing broadly applicable PCR primers in non-model organisms is rarely successful. This is true even for the most interesting and well-known plant nuclear loci

(Hughes et al. 2006) such as the *Waxy* (granule-bound starch synthase) or *LEAFY* genes, and other challenges, such as gene duplication, often necessitate extensive rounds of cloning to differentiate paralogs (e.g., Mason-Gamer et al. 1998; Hoot and Taylor 2001). Even when primers  
65 are successfully designed, they often cannot amplify low copy loci from degraded tissue samples, such as herbarium specimens, which means that their usefulness for studies on species-diverse or geographically widespread groups is limited. Consequently, most plant molecular phylogenetic studies consist of only a handful of linked loci from the plastid genome (e.g., *matK*, *ndhF*, *trnL-F*) and nrDNA cistron (ITS region, ETS; Hughes et al. 2006) and are rarely comprised of  
70 combined analyses of more than five sequenced regions from these two character sources.

Next-generation sequencing (NGS) technologies are directly and indirectly facilitating the exploration of new sources of molecular characters in non-model plants. Although full genome sequencing remains beyond the reach of most systematists, NGS promotes the development of genomic resources for new model organisms, which in turn provides data useful for the design of  
75 new Sanger-based markers such as low copy nuclear genes (Blischak et al. 2014; Chamala et al. 2015) or microsatellites (Gardner et al. 2011). In addition, the development of efficient multiplexing and enrichment methods are making NGS increasingly accessible as a method to directly gather data for larger species samples in non-model organisms (Cronn et al. 2012; Lemmon and Lemmon 2013). Low-coverage shotgun sequencing (genome skimming) and  
80 organellar genome enrichment permit rapid and efficient sequencing of large phylogenomic matrices from the high-copy regions of genomes (organelles and nrDNA; Straub et al. 2012). However, these approaches are limited by the finite size and generally linked nature of the

targeted regions, as they were prior to the invention of NGS. Moreover, they have been unable to completely resolve several important plant radiations (Xi et al. 2012; Barrett et al. 2013, 2014; 85 Ma et al. 2014; Straub et al. 2014). While cost-efficient alternatives, including RADseq (Baird et al. 2008) and transcriptome sequencing (e.g., Wen et al. 2013), can provide data from thousands of unlinked nuclear loci, they both have limitations for phylogenetic analysis. Indeed, RADseq datasets are characterized by short loci of uncertain homology and high amounts of missing data (Rubin et al. 2012; Huang and Knowles 2016), and although it has been used in phylogenetic 90 studies of radiations at least as old as 60 Ma (Gonen et al. 2015; Eaton et al. 2016), the existence of many different protocols and the anonymous nature of RADseq loci (lacking a reference genome) does not facilitate data sharing and reuse across study groups (Harvey et al. 2016). On the other hand, transcriptome sequencing has the potential to be useful at any taxonomic level, but important drawbacks include the complexity of working with RNA (Johnson et al. 2012), 95 especially when living material is not available, and the computational burden of gene assembly and orthology inference in plant genomes where gene families, paralogs, and splice variants are common (Cronn et al. 2012).

A more flexible and promising approach is hybrid enrichment, a method that reduces the bioinformatics and laboratory complexity of transcriptome sequencing by using probes designed 100 from existing genomic or transcriptomic sequences to enrich a fixed set of molecular targets (Lemmon and Lemmon 2013). Low-copy nuclear gene enrichment probes have already been designed to work across vertebrates (Faircloth et al. 2012; Lemmon et al. 2012), and they have been used in the phylogenetic analysis of birds (Prum et al. 2015), snakes (Pyron et al. 2014;

*Léveillé-Bourret et al. 2016*

*Anchored phylogenomics resolves plant radiation*

Ruane et al. 2015), lizards (Leaché et al. 2014; Brandley et al. 2015; Pyron et al. 2016), frogs  
105 (Peloso et al. 2014) and fishes (Eytan et al. 2015) amongst others. In plants, hybrid enrichment  
probes have been designed for several genera (e.g., de Sousa et al. 2014; Weitemier et al. 2014;  
Nicholls et al. 2015; Schmickl et al. 2015; Stephens et al. 2015; Heyduk et al. 2016; Johnson et  
al. 2016), a subfamily of palms (Arecoideae, Arecaceae; Comer et al. 2016), a subfamily of  
grasses (Chloridoideae, Poaceae; Fisher et al. 2016), and for the sunflower family (Asteraceae;  
110 Mandel et al. 2015). Although this taxon-specific approach in plants has been successful, it  
requires new probes to be designed for every group, and the data generated from such studies has  
limited potential to be reused because the targeted regions are group-specific. On the contrary, if  
conserved targets are selected, hybrid enrichment probes can be designed to work on broad  
taxonomic scales. This method, known as “anchored phylogenomics” (Lemmon and Lemmon  
115 2012), has the potential to provide parallel datasets for a fixed set of loci across large taxonomic  
groups, like flowering plants. In other words, anchored phylogenomics has the potential to  
become the modern NGS equivalent of the “universal” PCR primer papers that resulted in an  
explosion of phylogenetic studies in non-model organisms during the past decades (White et al.  
1990; Taberlet et al. 1991; Baldwin, 1992).

120 The success of hybrid enrichment in several isolated plant groups has motivated us to  
design a new set of flowering plant-specific probes that can enrich nuclear genes across all  
flowering plants. In a previous contribution, we identified 517 target loci using 25 angiosperm  
genomes and we demonstrated their universality and broad utility in flowering plants  
(Buddenhagen et al., [in prep.](#)). This new resource has the potential to greatly simplify and

125 accelerate plant phylogenomic research by reducing the burden of marker choice and probe  
design, and by promoting the accumulation of parallel data from a standard set of nuclear genes  
shared by all plant families. Moreover, it would be especially useful if it was able to resolve  
relationships at both higher and lower taxonomic levels. In fact, the angiosperm probe kit is  
already being widely adopted through numerous ongoing collaborations to collect data from  
130 nearly 90 angiosperm families for more than 2000 samples (to date) at the Center for Anchored  
Phylogenomics (e.g. Mitchell et al. 2017; [www.anchoredphylogeny.com](http://www.anchoredphylogeny.com)). Building upon  
Buddenhagen et al. (in prep.) where we examine the relationships of major angiosperm lineages,  
this contribution demonstrates the utility of the method to resolve difficult branches in a rapid  
radiation of tribes and genera (Cyperaceae, Cariceae-Dulichieae-Scirpeae).

135 The radiation of *Carex*, the most diverse flowering plant genus of the northern hemisphere  
(Starr et al. 2015), and its relatives within the Cariceae-Dulichieae-Scirpeae clade (hereafter  
CDS; Cyperaceae) provides an ideal case to test the utility of universal nuclear gene enrichment  
probes at medium and shallow phylogenetic depth in plants. With 16 genera and over 2,200  
species, this cosmopolitan clade is of considerable evolutionary interest due to its habitat variety  
140 (deserts to rain forests), biogeographic patterns (e.g., bipolar, Gondwanan, Amphiatlantic; Croizat  
1952), and unique cytology ( $n = 6$  to 56) promoted by agmatoploid chromosomal fusion and  
fragmentation (Hipp et al. 2009). Previous phylogenies of CDS have identified seven major  
lineages using the traditional combination of plastid and nrDNA markers (Muasya et al. 2009;  
Léveillé-Bourret et al. 2014; Léveillé-Bourret et al. 2015). However, like many plant groups, the  
145 backbone of the tree remains unresolved possibly due to a relatively old crown age (>40 Ma) and



an early radiation that occurred over just 10 million years (Escudero et al. 2013; Spalink et al. 2016). As a result, the most rapidly-evolving plastid genes contain few, if any, characters to support the backbone topology, whereas non-coding plastid and nrDNA regions have diverged so much they cannot be confidently aligned across the whole group. These factors suggest that large  
150 numbers of nuclear genes are needed to resolve the backbone phylogeny of CDS, and universal anchored phylogenomics probes could provide the quick and efficient means to obtain them.

The aims of this study were twofold to: 1) test the utility of anchored phylogenomics in closely related genera of flowering plants showing evidence of rapid diversification; and 2) to resolve long-standing taxonomic problems in CDS by estimating a robust phylogeny of the major  
155 lineages of the clade. Using the first set of universal probes available for nuclear gene enrichment in flowering plants, we collected data from hundreds of loci in 34 species not included in the initial probe design and representing the full phylogenetic diversity of the CDS clade. To determine whether the results of such an analysis would be compatible with prior analyses, we compared our genomic tree to a phylogeny estimated from a typical plastid plus nrDNA Sanger-  
160 derived dataset that is still commonly generated by many researchers today (i.e., a plastid and nrDNA analysis). We discuss the value of anchored phylogenomics for resolving rapid radiations in flowering plants, and the implications of our results on the taxonomy and evolution of the Cariceae-Dulichieae-Scirpeae clade.

## MATERIALS AND METHODS

### 165 *Taxon Sampling and DNA extraction*

A total of 32 ingroup taxa were included to represent the all major clades of the CDS clade as based on a previous phylogenetic study with extensive taxonomic sampling of the clade (Léveillé-Bourret et al. 2014). This includes *Dulichium arundinaceum* (Dulichieae; comprising ca. 7 spp.), *Khaosokia caricoides* (incertae sedis), both *Calliscirpus* species (Calliscirpus Clade; 2 170 spp.), *Amphiscirpus nevadensis* (Zameioscirpus Clade; comprising ca. 8 spp.), 5 *Scirpus* and 3 *Eriophorum* species (Scirpus Clade; comprising ca. 48 spp.), 2 *Trichophorum* species (Trichophorum Clade; comprising ca. 18 spp.), and 18 *Carex* species (Cariceae; comprising ca. 2,150 spp.) representing all major Cariceae lineages identified by Starr et al. (2015). Two outgroup taxa (*Eleocharis obtusa* (Willd.) Schult.; Eleocharideae and *Erioscirpus comosus* 175 (Wall.) Palla; Cyperae ) were selected from the CDS sister group, the Abildgaardieae-Eleocharideae-Cyperae-Fuireneae clade (Muasya et al. 2009). Two accessions of *Scirpus atrovirens* were included to test the repeatability of the hybrid-enrichment methodology. Leaves collected fresh in the field and dried immediately in silica gel were used in whole genomic DNA extractions using the silica-column based protocol of Alexander et al. (2007) as modified by Starr 180 et al. (2009). However, increased quantities of leaf tissue (80–100 mg instead of 20 mg) and reagents were used to account for the greater mass of DNA required for NGS protocols. We aimed for 1-3 µg of DNA for hybrid enrichment, although some samples with as little as 0.15 µg of DNA worked very well with our methodology. Voucher information is available in **Appendix 1**.

185 *Hybrid Enrichment Data Collection*

Data were collected following the general methodology of Lemmon et al. (2012) through the Center for Anchored Phylogenomics at Florida State University (<http://anchoredphylogeny.com/>). After extraction, genomic DNA was sonicated to a fragment size of ~300-800 bp using a Covaris E220 Focused-ultrasonicator with Covaris microTUBES.

190 Subsequently, library preparation and indexing were performed on a Beckman-Coulter Biomek FXp liquid-handling robot following a protocol modified from Meyer and Kircher (2010). Briefly, sonication is followed by blunt-end repair using T4 DNA polymerase, two different adapters are ligated to both ends of the DNA molecules using T4 DNA ligase, and indexes and full length adapter sequences are added by amplification with 5'-tailed primers. An important

195 modification of this protocol is the addition of a size-selection step after blunt-end repair using SPRI select beads (Beckman-Coulter Inc.; 0.9× ratio of bead to sample volume). Indexed samples were then pooled at equal molarities (typically 16-18 samples per pool), and then each pool was enriched using the Angiosperm v.1 kit (Agilent Technologies Custom SureSelect XT kit), which contained probes for 517 flowering plant exons (average: 287 bp, median: 225 bp) as described

200 by Buddenhagen et al. (in prep.). Briefly, the probes were designed by selecting genes that are putatively single copy in *Arabidopsis*, poplar (*Populus*), grape (*Vitis*) and rice (*Oryza*), filtering out exons below the minimum size necessary for enrichment, and then narrowing down on the exons that had  $\geq 55\%$  similarity between *Arabidopsis* and rice. Using these two taxa as reference, orthologous regions from 33 complete flowering plant genomes were identified, and the 517

205 exons that had an average copy number  $\leq 1.2$  per genome were selected for probe design. More

*Léveillé-Bourret et al. 2016*

*Anchored phylogenomics resolves plant radiation*

details, including the probe sequences, can be found in Buddenhagen et al. (in prep.). After enrichment, 3–4 enrichment reactions were pooled in equal quantities for each sequencing lane and sequenced on paired-end 150-bp Illumina HiSeq 2500 lanes at the Translational Science Laboratory in the College of Medicine at Florida State University.

210

### *Assembly*

Reads passing quality filtering were checked for overlap and merged following Rokyta et al. (2012). Reads that could not be merged were treated as unpaired during assembly. Reads were assembled on the flowering plant anchored enrichment references following Buddenhagen et al. (in prep.) and contigs were extended into flanking regions using a *de novo* assembler. Briefly,

215

preliminary matches between each read and the reference sequences were called if 17 bases matched a library of spaced 20-mers derived from the references. Reads were then considered mapped if 55 matches were found over 100 consecutive bases in the reference sequences (all possible gap-free alignments between the read and the reference were considered). The approximate alignment position of mapped reads were estimated using the position of the spaced

220

20-mer, and all 60-mers existing in the read were stored in a hash table used by the *de novo* assembler. Then, the *de novo* assembler maps additional reads by identifying exact matches between a read and one of the 60-mers in the hash table. Simultaneously using the two levels of assembly described above, the reference sequences were traversed repeatedly until a pass produced no additional mapped reads, enabling extension of assemblies into variable flanking

225

regions. Contigs were estimated from 60-mer clusters. For each locus, a list of all 60-mers found in the mapped reads was compiled, and the 60-mers were clustered if found together in at least

two reads. Each cluster of 60-mers was then used to separate the reads into contigs. Relative alignment positions of reads within each contig were then refined in order to increase the agreement across the reads. Up to one gap was also inserted per read if needed to improve the alignment. In the absence of contamination, low coverage or gene duplication, each locus should produce one assembly cluster. Consensus bases were called from assembly clusters as ambiguous base calls (IUPAC ambiguity codes) only when polymorphisms could not be explained as sequencing error (assuming a 0.1 probability of error and alpha equal to 0.05, Buddenhagen et al., **in prep.**). Called bases were soft-masked (made lowercase) for sites with coverage lower than 5. Assembly contigs derived from less than 10 reads were removed in order to reduce the effects of cross contamination and rare sequencing errors in index reads.

### *Orthology, Filtering and Alignment*

Orthology was determined for genes with multiple copies following Prum et al. (2015). Briefly, for each locus, the distance between each pair of contig sequences was computed as the proportion of shared 20-mers. The list of 20-mers was constructed from both consecutive bases and spaced bases (every third base). Contig sequences were then clustered with neighbor-joining (NJ) using this alignment-free distance measure, allowing at most one sequence per species in each NJ cluster. This results in multiple clusters, each containing at most one sequence per species. Each cluster is then treated as a probable paralog. Gene copies were efficiently sorted using their variable flanking regions recovered during extension assembly. Clusters containing fewer than 50% of the species were removed from downstream processing. Finally, alignments of the remaining orthologous sequence clusters were performed with MAFFT v. 7.023b (Katoh

2013), with the --genafpair and --maxiterate 1000 flags utilized, and alignments were trimmed/masked using the steps from Prum et al. (2015) and Buddenhagen et al. (in prep.).

250 Briefly, a sliding window of 20 bp was used to mask regions where <10 sites had the most common character present in at least 40% of the sequences. Sites with fewer than 12 unmasked bases were also removed from the alignments. Because of the relatively deep phylogenetic timescale of this study, many variable sites in the regions flanking the conserved exonic core of the probes were masked because they were too variable to align across all taxa.

255 After the initial automatic alignment in MAFFT, there remained several obviously misaligned regions that were were not removed by the previous filtering step. We initially tried using Gblocks 0.91b (Castresana 2000) to exclude poorly aligned or highly divergent regions, but no parameter combinations could remove some clearly misaligned regions, whereas apparently well-aligned and informative regions were often excluded. This was probably due to the fact that  
260 most ambiguous stretches consisted of a few completely misaligned sequences within well-conserved blocks, a situation which is known to confound Gblocks (Castresana 2000). In consequence, all nuclear gene alignments were visually examined and sites containing misaligned bases, diagnosed by long (>3 bp) stretches of disagreements to the consensus sequence in one or a few taxa, were excluded. All the separate alignments were combined in a single concatenated  
265 alignment for concatenated analyses or kept separate for analyses based on gene trees.

### *Phylogenetic Analyses*

*Parsimony analyses.*—Heuristic maximum parsimony (MP) searches on the concatenated

alignment were performed in PAUP\* v4.0 (Swofford 2003) using 1,000 random addition  
sequence (RAS) replicates, tree-bisection-reconnection branch swapping, holding 5 trees at each  
270 step and with the STEEPEST option ON. To prevent undersampling-within-replicate and  
frequency-within-replicate artefacts, support was assessed with 1000 jackknife 50% replicates  
using 10 RAS replicates, saving a maximum of 10 trees per RAS, and using the strict-consensus  
jackknife (GRPFREQ=NO) following the recommendations of Simmons and Freudenstein  
(2011). Single-locus parsimony analyses and partitioned, hidden and total Bremer support values  
275 were calculated in PAUP with the help of ASAP, a perl script provided by Sarkar et al. (2008).  
Concatenated MP analyses excluding outgroups and/or Cariceae were made to determine whether  
they could be causing long branch attraction problems affecting ingroup topology.

*Concatenated maximum likelihood analyses.*—Concatenated maximum likelihood (ML)  
analyses were performed in RAxML 8.1.11 (Stamatakis 2014) on the CIPRES Science Gateway  
280 v3.3 (Miller et al. 2010). The partitioning scheme was selected among all locus subsets with  
PartitionFinder v1.1.1 (Lanfear et al. 2012) using the relaxed hierarchical clustering algorithm  
(Lanfear et al. 2014) based only on subset similarity (--weights 1,0,0,0), with --rclust-percent  
settings of 1%, 2%, 4% and 10% and using the Bayesian information criterion (BIC), with  
GTR+G as the only allowed model. The best scoring scheme (BIC = 3,277,453.37809) was found  
285 at a --rclust-percent setting of 4% and comprised 19 partitions with 2–127 loci and 395–31,991  
distinct alignment patterns. RAxML searches were made with 100 randomized maximum  
parsimony starting trees and the new rapid hill-climbing algorithm (Stamatakis et al. 2007).  
Branch support was assessed with 100 (standard) bootstrap replicates (Felsenstein, 1985). Single-

locus ML searches were done using the rapid hill-climbing algorithm and 200 rapid bootstrap  
290 replicates (option -f a) using a python script to input the parameters to RAxML 8.1.21. Internode  
and tree certainty values were calculated in RAxML 8.2.4 (Salichos et al. 2014).

*Species tree analyses.*—Our phylogenetic problem is characterized by very short backbone  
branches susceptible to gene tree incongruence (Degnan and Rosenberg 2006). However, fully  
parametric coalescent-based species tree estimation such as \*BEAST is too computationally  
295 demanding to be used with hundreds of loci and 34 taxa (Ogilvie et al. 2016). We therefore  
estimated the species tree with ASTRAL-II v4.10.12 (hereafter ASTRAL), a “summary” species  
tree method that has been shown to be more accurate and less sensitive to gene tree estimation  
error than alternatives (e.g. MP-EST) in simulation studies (Mirarab et al. 2014; Chou et al. 2015;  
Mirarab and Warnow 2015). Trees from the single-locus RAxML searches were used as input in  
300 ASTRAL, and branch support was assessed with local posterior probabilities (Sayyari and  
Mirarab 2016) and with 100 gene and site bootstrap replicates (option -g -r). Internode certainty  
of the branches of this tree were calculated in RAxML 8.2.4 based on all bipartitions of each  
quartet, and using the lossless adjustment scheme to correct for incomplete gene trees (Salichos et  
al. 2014, Kobert et al. 2015).

305 *Substitution saturation.*— Site-specific substitution rates were estimated in IQ-TREE 1.5.0  
(Nguyen et al. 2015) by re-optimizing a single GTR+G (16 rate categories) model to the whole  
concatenated alignment using the ML topology found by RAxML, and using the “-wsr” option.  
Using these site-specific rates, the  $\frac{1}{3}$  fastest-evolving sites were extracted and tested for



substitution saturation. These sites should be dominated by 3<sup>rd</sup> codon positions and non-coding  
310 bases. Substitution saturation was assessed by plotting raw number of transversions and  
transitions against GTR distances and noting whether a plateau is attained. Additionally, the  
statistical test of substitution saturation of Xia et al. (2003) was made in DAMBE (Xia and  
Lemey 2009; Xia 2015) with 1,000 jackknife replicates on subsets of 4, 8, 16 and 32 taxa.

*Sources of incongruence.*— Multiple factors such as lateral gene transfer, gene duplication,  
315 hybridization, incomplete lineage sorting and gene tree estimation error cause incongruence  
between gene trees and their associated species tree. Different types of exploratory data analyses  
were therefore done to pinpoint the sources of incongruence in our dataset, and especially to  
determine whether the observed incongruence between gene trees is caused by biological factors  
(hard incongruence) or is simply due to gene tree estimation error (soft incongruence). Robinson-  
320 Foulds distances between ML-estimated gene trees and ASTRAL-estimated species trees were  
calculated with the ape package (Paradis et al. 2004) in R (R Core Team 2016). We made a linear  
regression of gene tree to species tree distances against the average gene tree bootstrap support.  
In addition, bootstrap support of gene tree branches present or absent in the species tree were  
compared with the help of histograms. Several reduced concatenated MP analyses were made  
325 including only loci conflicting with selected backbone branches (Fig. 1) to determine whether  
combined analyses would give similarly conflicting results, which would be expected in the case  
of hard incongruence, or whether combined analysis would negate conflict, which should happen  
if incongruence was simply due to gene tree estimation error. Scatter plots, histograms and linear  
regression coefficients were drawn and calculated with R.

330 *Reduced analyses.*—The influence of the number of loci and analysis method on the  
reconstructed phylogeny was assessed with reduced analyses. In each analysis, a number of loci  
were randomly selected (without replacement) and analyzed either by concatenation in RAxML  
or with ASTRAL. Then, Robinson-Foulds distance between the resulting tree and our best  
estimate of the species tree (ASTRAL) was calculated. This procedure was repeated 200 times  
335 for 5, 10, 20, 50, 100, 200 and 400 loci in ASTRAL, and 50 times for the same number of loci in  
RAxML. To determine if the information content of the selected loci has an effect on  
phylogenetic analyses, we ranked loci based on number of informative characters and repeated  
the ASTRAL reduced analyses with the 33% highest ranking loci and the 33% lowest ranking  
loci, making 200 replicate analyses with 5, 10, 20, 50 and 100 loci. Boxplots were drawn with R  
340 (R Core Team 2016).

### *Comparative Sanger Matrix*

To compare phylogenetic results obtained with hybrid enrichment, data from the plastid  
genes *matK* and *ndhF* (Gimour et al. 2013), as well as the nrDNA region ETS-1f, were obtained  
from Genbank for the same species as those used in phylogenomics analysis (but replacing the  
345 outgroup *Eleocharis obtusa* with *E. acicularis* and including only one *Scirpus atrovirens*  
accession). Five sequences were newly obtained by PCR and Sanger-sequencing following the  
protocols in Léveillé-Bourret et al. (2015). Genbank accession numbers and voucher information  
are available in [Appendix 2](#).

The sequences were concatenated by species, aligned with the MAFFT v7.017b (Kato and

350 Standley 2013) plugin in Geneious 8.1.7 (<http://www.geneious.com>; Kearse et al. 2012), and the resulting alignments were corrected by hand. Concatenated maximum likelihood (ML) analyses were done in RAxML 8.2.4 (Stamatakis 2014). The partitioning scheme was selected among all codon and locus subsets with PartitionFinder v1.1.1 (Lanfear et al. 2012) using an exhaustive search (Lanfear et al. 2014) and using the Bayesian information criterion (BIC), with GTR+G as  
355 the only allowed model. The best scoring scheme (BIC = 31,271.0585328) comprised three partitions: codons 1 and 2 of *matK* and *ndhF*, codon 3 of *matK* and *ndhF*, and ETS-1f. RAxML searches were done using the rapid hill-climbing algorithm and support estimated with 500 rapid bootstrap replicates (option -f a). Support in parsimony was assessed with 500 bootstrap replicates in PAUP\* v4.0, using 10 RAS replicates, saving a maximum of 20 trees per RAS, and  
360 using the strict-consensus bootstrap (GRPFREQ=NO).

## RESULTS

### *Sequence Characteristics*

A total of 462 loci were recovered from the Illumina reads, including 456 targets in single-copy, three targets duplicated into two paralogs each, and only 59 targets not recovered (11.4%  
365 of the 517). A single locus possessed no informative variation and was excluded. The average base coverage of loci before trimming was 0–5576 (mean = 234) across terminals, and maximum number of distinct copies per locus (before orthology filtering) ranged from 1 to 4 (mean = 1.4). After alignment and removal of misaligned bases, loci were 219–1,875 bp long (mean = 649), with 1–80% of their length consisting of flanking sequence (mean = 56%), and each with 26–371  
370 parsimony informative characters (mean = 120). Two hundred seventy-nine loci were missing

some terminals, but 99% of all loci had at least 29 (83%) terminals. Each terminal had data for 425–462 loci, averaging 457 loci per terminal (98.9% of all loci). The combined dataset was 299,241 bp long after trimming and exclusion of 6,649 misaligned sites. This included 55,417 (18.5%) parsimony informative characters, 4.7% missing, 0.4% ambiguous bases and a GC-  
375 content of 40%. Sequence statistics for each locus are found in [online Appendix 1 \(available from the Dryad Digital Repository: <http://dx.doi.org/10.5061/dryad.55h30>\)](#). The two *Scirpus atrovirens* accessions had 99.3% identical sites and almost identical coverage, with only 5,865 sites (ca. 1% of total aligned length) present in one accession but absent in the other. No evidence of strong substitution saturation was found in the  $\frac{1}{3}$  fastest-evolving sites. A non-linear trend was visible in  
380 the GTR vs transversions and the GTR vs transition plots ([online Appendix 2](#)), but the Iss values (0.364–0.424) were significantly smaller ( $p < 0.001$ ) than critical thresholds (0.603–0.860) for all subset sizes and for symmetrical and asymmetrical topologies, which suggest little saturation (Xia et al. 2003).

### Phylogenetic Results

385 Concatenated parsimony searches on the phylogenomic matrix found a single shortest tree of 219,733 steps (consistency index = 0.71, retention index = 0.74; [online Appendix 3](#)). The best tree found by concatenated ML searches had a log-likelihood of -1,636,930.180799 as calculated by RAxML ([online Appendix 4](#)). The best MP and ML trees were almost identical to the ASTRAL species tree ([Fig. 1](#)), except for an unsupported sister-relationship between *Carex*  
390 *canescens* (representing the Vignea Clade) and the Core Carex Clade in MP, and a highly supported (100% BS) sister-relationship between *Scirpus cyperinus* and *S. atrovirens* in MP and

ML. Relationships between major lineages of the CDS clade, the focus of this study, were identical in all analyses, and their relative position remained stable when outgroups and/or Cariceae were excluded from MP analyses. The MP and ML trees obtained with the comparative  
395 Sanger matrix (*matK* + *ndhF* + ETS-1f) were completely congruent with the phylogenomics results, except that most backbone branches had low support in the the Sanger matrix, but very high support in the phylogenomic matrix (Fig. 1).

Phylogenetic analyses position Dulichieae and *Khaosokia* as successive sisters to a highly supported Cariceae + Scirpeae clade. Within this clade, Scirpeae forms four major lineages in  
400 three monophyletic groups: a Calliscirpus Clade (*Calliscirpus*) sister to everything else, *Amphiscirpus* (representing the Zameioscirpus Clade) sister to a Scirpus Clade (*Scirpus* + *Eriophorum*), and a Trichophorum Clade (*Trichophorum*) sister to Cariceae. These backbone relationships are highly supported by all analyses except for the position of *Calliscirpus*, which is highly supported in MP and ML, but is supported in only 68% of ASTRAL bootstrap replicates,  
405 with the most frequent conflicting BS replicate trees (31%) putting *Calliscirpus* sister to the clade comprising the Zameioscirpus Clade + Scirpus Clade.

### *Incongruence Between Gene Trees*

Incongruence between ML estimated gene trees was high in the short backbone branches of the phylogeny. This is reflected by small internode certainty values and relatively high numbers  
410 of loci with negative partitioned Bremer support (supporting conflicting clades in parsimony) for these short branches identified by letters A to E in Figure 1 (Table 1). However, support and

resolution of backbone branches was low in most estimated gene trees, and there was a clear negative relationship between average ML bootstrap (across all branches) of a gene tree and its distance to the ASTRAL species tree (Fig. 2,  $R^2 = 0.24$ , slope = -0.0063, slope p-value  $< 10^{-15}$ ). In addition, the average bootstrap support for branches present in the ML gene trees, but absent in the species tree, was considerably lower than support for branches present in both (Fig. 3). Combined analyses identified extensive emergent support for the backbone branches of the estimated species tree even in loci that are apparently conflicting in single-locus analyses, as shown by the high proportion of hidden Bremer support for backbone branches (Table 1). Likewise, concatenated MP analyses of all loci conflicting with selected backbone branches (identified with letters in Fig. 1) always gave highly supported trees completely congruent with the backbone of our estimated species tree, consistent with soft incongruence due to gene tree estimation error rather than hard incongruence due to biological factors.

### *Reduced Analyses*

The 33% highest and 33% lowest ranking loci in terms of number of potentially informative characters had an average of 161.2 (sd = 34.4) and 81.6 (sd = 16.7) informative characters, respectively. Results obtained in reduced analyses by using all loci in ASTRAL, RAxML, or with only the highest or lowest ranking loci in ASTRAL, were all broadly similar. Distance between trees estimated in reduced analyses and the best species tree diminished with increasing number of loci per jackknife replicate, with the majority of replicates having less than 10% conflicting bipartitions with 100 loci or more (Fig. 4). With ASTRAL and 200 loci or more, all replicates had a backbone identical to the best species tree, whereas the position of

Léveillé-Bourret et al. 2016

*Anchored phylogenomics resolves plant radiation*

*Calliscirpus* was inconsistent in a minority of replicates with 100 loci. Results were similar when using the highest and lowest ranking loci in ASTRAL. With RAxML, 100 loci were sufficient to  
435 get a backbone identical to the species tree in all replicates.

## DISCUSSION

### *Targeted NGS of Conserved Nuclear Genes in Phylogenetic Inference*

Using the first set of universal probes available for nuclear gene enrichment in flowering plants, we were able to collect data from hundreds of loci in 34 taxa representing a typical  
440 flowering plant radiation encompassing >40 million years of evolution (Escudero et al. 2013; Spalink et al. 2016). Despite short backbone internodes connected to long branches, typical of ancient rapid radiations (Whitfield and Lockhart 2007), the inferred backbone relationships were well supported in both concatenation and coalescence-based analyses. These results illustrate the great promise of anchored phylogenomics for the resolution of rapid ancient radiations of non-  
445 model organisms.

Important amounts of incongruence between estimated gene trees was found in our dataset. The observation that gene tree incongruence was inversely proportional to the amount of phylogenetic information content (as measured by average gene tree ML bootstrap) indicates that at least part of the incongruence must be due to gene tree estimation error. This is corroborated by  
450 the lower bootstrap support of gene tree branches absent in the species tree, and the high amount of hidden Bremer support in the shortest branches of the backbone. This also explains why ASTRAL analyses necessitate more loci (ca. 200) than ML analyses (ca. 100) to get consistent

results on the backbone relationships of CDS: the estimated gene trees that ASTRAL takes as input are highly affected by estimation error, whereas concatenation presumably amplifies the phylogenetic signal common to all loci, thus reducing the relative influence of noise on the results (Townsend et al. 2012; Bayzid et al. 2015; Warnow 2015; Meiklejohn et al. 2016). The same effect is seen in several simulation studies that have shown higher efficiency of concatenation relative to summary coalescence methods when incomplete lineage sorting is low (e.g. Bayzid and Warnow 2013; Chou et al. 2015; Mirarab et al. 2016). Because the probes used for enrichment were designed to be universal for flowering plants, and since many sites in the variable flanking regions were filtered out because of the phylogenetic depth of the study, the anchored loci tend to be slow-evolving in this study. This resulted in modest numbers of informative characters per locus and low levels of support for individual gene phylogenies. However, it should be noted that the faster evolving flanking regions of the probes could be retained in studies focusing on shallower divergences where additional sequence variation is needed.

It has been argued that small numbers of highly-informative loci are preferable to larger numbers of more slowly-evolving loci when attempting to resolve phylogenies with short branches (Salichos and Rokas 2013). However, the matter is certainly more complex, because more variable loci are often noisier due to multiple substitutions (Townsend et al. 2012) and they have a higher susceptibility to long-branch attraction (Felsenstein 1978; Bergsten 2005). In the case of rapid ancient divergences, difficulties arise because of multiple factors: short backbone branches offer poor phylogenetic signal and increase the probability of deep coalescences,



whereas long terminal branches are susceptible to problems of substitution saturation and long-  
475 branch attraction (Whitfield and Lockhart 2007). This creates an apparent tradeoff, since fast-  
evolving loci have a higher probability of containing variation informative for short backbone  
branches, but are also more susceptible to substitution saturation and long-branch attraction.  
Indeed, selection of loci should not aim for enormous amounts of variation dominated by noise,  
but rather for sufficient variation with a high signal/noise ratio and good taxonomic coverage  
480 (Philippe et al. 2011; Betancur-R. et al. 2014; Hedtke et al. 2006). For this reason, slowly-  
evolving, homoplasy-free markers have been suggested to be optimal for the resolution of ancient  
rapid radiations (Whitfield and Lockhart 2007). Empirical results and simulation studies also  
indicate that unresolved gene trees are less problematic in a species tree framework than gene  
trees potentially biased by substitution saturation or long-branch attraction (Chiari et al. 2012; Xi  
485 et al. 2015). All these considerations seem to indicate that resolving rapid radiations would profit  
more from large numbers of conserved loci than from similar numbers of more variable loci. This  
idea is clearly supported by our success in resolving the polytomy at the base of the CDS clade  
with hundreds of conserved nuclear genes, despite low levels of support for individual gene trees.  
Our reduced analyses likewise indicate that using loci with higher or lower numbers of  
490 informative characters has almost no effect on our results, whereas the number of loci had a very  
significant effect on precision of species tree and concatenation analyses. This suggests that  
future phylogenomic studies based on conserved nuclear loci could profit more from large  
numbers of loci than from sampling more characters per locus, despite the likelihood that longer  
loci could decrease gene tree estimation error. However, Meiklejohn et al. (2016) found that

495 species tree estimation methods gave inconsistent results when using gene trees with very low  
signal (<25 informative characters), whereas more informative loci gave more consistent results.  
The lack of relationship we found between gene tree information content and species tree  
accuracy could be explained by the fact that all our loci contained at least 26 informative  
characters, which suggests that there could exist a threshold below which methods based on  
500 estimated gene trees might lose their accuracy. This subject should be explored further to  
determine whether such a threshold exists.

Our test case suggests that the efficiency of anchored phylogenomics to enrich specific and  
universal flowering plant loci is highly promising, and the method could thus simplify next-  
generation sequencing data collection and sharing across diverse flowering plant groups. Of the  
505 517 anchored phylogenomics loci targeted in this study, approximately 90% produced useable  
data. In addition, different accessions of the same species provided almost identical sequence and  
coverage, suggesting that the methodology is reproducible and will provide data that can be re-  
used and combined in future phylogenetic studies. Other next-generation sequencing approaches  
in plants have up to now focused on target-enrichment of lineage-specific nuclear loci (de Sousa  
510 et al. 2014; Nicholls et al. 2015; Stephens et al. 2015; Heyduk et al. 2016) or on the anonymous  
and very short markers provided by RADseq (e.g. Eaton and Ree 2013; Escudero et al. 2014;  
Hipp et al. 2014; Gonzalez 2014; Massatti et al. 2016). Lineage-specific target-enrichment  
approaches have the advantage of being tailored for the group of interest, and are thus expected to  
perform better on average. However, this is counter-balanced by the additional cost and time  
515 needed to design new probes for every taxonomic group, and the limitations that lineage-specific

markers impose on data sharing and reuse across taxonomic groups. RADseq, on the other hand, enables rapid and cost-efficient production of tens to hundreds of thousands of loci in large numbers of individuals without the need for genomic references. The short length of RADseq loci (mostly limited by read-length) makes determination of homology difficult, for instance creating  
520 a tradeoff between the number of putative loci retained for analysis and the proportion of loci which are truly orthologous (Rubin et al. 2012; Harvey et al. 2016). High levels of missing data due to uneven coverage, mutation-induced locus-dropout or other causes (ca. 30-80% in published analyses; Mastretta-Yanes et al. 2015; Eaton et al. 2016) creates a similar tradeoff where excluding loci with missing data also significantly reduces the total number of informative  
525 characters in the dataset. Despite this, several studies have now demonstrated that radiations at least as old as 60 Ma can be successfully resolved using lax similarity cutoffs during assembly and inclusion of all loci with at least 4 terminals, which suggests that paralogy and missing data may not be problematic for RADseq in most applications (Gonen et al. 2015; Eaton et al. 2016; Huang and Knowles 2016). One advantage of RADseq compared to Anchored Phylogenomics is  
530 the ability to tailor the number of loci to the phylogenetic question and resources available, while there is a hard limit to the number of loci in hybridization-based approaches (517 loci in our case). On the other hand, data sharing and reuse remains an issue with RADseq because of the use of different enzymes and library preparation methods, the difficulty of assessing orthology at deeper evolutionary timescales and the anonymity of RADseq loci when lacking  
535 reference genomes (Ree and Hipp 2015; Harvey et al. 2016). Compared to both lineage-specific approaches and RADseq, the universality and easy comparability of anchored phylogenomics

results in significant savings in cost and time whilst simplifying data analysis and sharing.

### *Phylogenetic and Taxonomic Implications*

After nearly two decades of molecular work on the higher-level phylogeny of the sedge  
540 family (Cyperaceae; starting with Muasya et al. 1998), one of the most enduring problems has  
been the placement of tribe Cariceae and the identification of its sister group. This is true despite  
considerable interest in the evolution, biogeography and ecology of the tribe (more than 140  
articles per year since 2010 according to Web of Science), which is derived in part from its  
exceptional diversity (ca. 2,000 species), global distribution, and peculiar cytology  
545 (agmatoploidy,  $n = 6$  to 56, holocentric chromosomes). Lack of knowledge of Cariceae's sister  
group has important implications, since the accuracy of any morphological, ecological or  
geographical character reconstruction is affected by outgroup choice, outgroup relationships, and  
its effects on ingroup topology (Lyons-Weiler et al. 1998; Wheeler 1990; Graham et al. 2002;  
Wilberg 2015).

550 Continued work towards inclusion of more informative molecular regions or increasing  
taxonomic sampling has resulted in good support for seven major lineages within a clade  
consisting of tribes Cariceae, Dulichieae and Scirpeae (CDS), but relationships between these  
major lineages and the identity of Cariceae's sister group has remained elusive (Léveillé-Bourret  
et al. 2014). Previous studies have placed Cariceae sister to a monophyletic Scirpeae (Muasya et  
555 al. 2009) or nested within a paraphyletic Scirpeae and sister to either a Trichophorum Clade  
(Léveillé-Bourret et al. 2014), the genus *Calliscirpus* (Gilmour et al. 2013) or a clade consisting

*Léveillé-Bourret et al. 2016*

*Anchored phylogenomics resolves plant radiation*

of the Scirpus Clade + Zameioscirpus Clade (Jung and Choi 2012). The only consistency has been the poor support for all backbone relationships, a consequence of a rapid radiation (ca. 10 My) followed by long divergence (30–40 My) between major CDS lineages (Escudero et al. 2013; Spalink et al. 2016). Our highly supported results, based on data from hundreds of nuclear genes encompassing hundreds of thousands of base pairs, identify the Trichophorum Clade as sister to Cariceae and are in complete agreement with the results of the most inclusive plastid phylogeny of CDS (Léveillé-Bourret et al. 2014). Such a high congruence between phylogenetic estimates based on the nuclear and plastid genomes gives us confidence in the robustness of the results and confirms the usefulness of targeted-enrichment of conserved nuclear genes for phylogenetic analysis at the tribal level and above in sedges (Cyperaceae). Moreover, since the enrichment probes we used are universal and are flanked by regions of variable evolutionary rates, they could be equally effective for low-level phylogenetic investigation of flowering plants in general.

Our analyses strongly support the paraphyly of tribe Scirpeae, a long-expected result given the likely plesiomorphic nature of its defining characteristics (Goetghebeur 1998). Moreover, the isolated phylogenetic position of *Khaosokia* definitely excludes it from any currently recognized Cyperaceae tribe. These phylogenetic results are congruent with previously identified morphological and embryological variation (Léveillé-Bourret et al. 2014), but a lack of support in previous phylogenetic analyses has prevented taxonomic changes from being made. The robust phylogenetic estimates obtained in this study now provide a solid foundation for a complete revision of the tribal taxonomy of the CDS clade. It is clear that preservation of the highly

distinctive Cariceae within a natural and inclusive tribal classification will necessitate the naming of at least three new tribes. Such strongly supported results would probably never have been  
580 achieved without genome-scale phylogenetic analyses, which clearly demonstrates the importance of new data acquisition and analysis methodologies in the progress of systematics and taxonomy.

## ACKNOWLEDGMENTS

The authors thank the curators of the following herbaria for loaning material and  
585 permission to sample specimens for DNA analysis: Jennifer Doubt (CAN), Dr. Paul Catling (DAO), Dr. Paul E. Berry (MICH) and Dr. Luc Brouillet (MT). We also thank Marie-Ève Garon-Labrecque (DAO), Kellina Higgins (MT), Jacques Cayouette (DAO) and Alexandre Bergeron (MT) for having collected or helped with the collection of canadian material. Nguyễn Thị Kim Thanh (HNU), Vũ Anh Tài (HNU) and Jack Regalado (MO) provided field assistance in  
590 Vietnam. Michelle Kortyna, Alyssa Bigelow and Sean Holland help with the lab work. Kirby Birch helped with the bioinformatics. Erika Edwards, Mark Fishbein and five anonymous reviewers made helpful comments on the manuscript. This research was conducted as part of the requirements for a Ph.D. at the University of Ottawa (UofO), with support from an Alexander-Graham-Bell Research Scholarship from the Natural Sciences and Engineering Research Council  
595 of Canada (NSERC) and an Excellence Scholarship from the UofO to ÉLB. This research was also funded by a NSERC Discovery Grant to JRS for laboratory and field work, and National Geographic Society Research and Exploration Grants (#9035-11, #9441-14) to BAF (Principal Investigator) for field-work in Vietnam. Additional funding was provided by the National Science

Foundation through awards to ARL and EML, (NSF IIP-1313554), and to EML (NSF DEB-  
600 1120516).

## LITERATURE

- Álvarez I., Wendel J.F. 2003. Ribosomal ITS sequences and plant phylogenetic inference. *Mol. Phylogenet. Evol.* 29: 417–434.
- 605 Baird N.A., Etter P.D., Atwood T.S., Currey M.C., Shiver A.L., Lewis Z.A., Selker E.U., Cresko W.A., Johnson E.A. 2008. Rapid SNP discovery and genetic mapping using sequenced RAD markers. *PLoS ONE* 3: e3376.
- Baldwin B.G. 1992. Phylogenetic utility of the internal transcribed spacers of nuclear ribosomal DNA in plants: an example from the compositae. *Mol. Phylogenet. Evol.* 1: 3–16.
- 610 Barrett C.F., Davis J.I., Leebens-Mack J., Conran J.G., Stevenson D.W.. 2013. Plastid genomes and deep relationships among the commelinid monocot angiosperms. *Cladistics* 29: 65–87.
- Barrett C.F., Specht C.D., Leebens-Mack J., Stevenson D.W., Zomlefer W.B., Davis J.I. 2014. Resolving ancient radiations: can complete plastid gene sets elucidate deep relationships among the tropical gingers (Zingiberales)? *Ann. Bot.* 113: 119–133.
- 615 Bayzid M.S., Warnow T. 2013. Naive binning improves phylogenomic analyses. *Bioinformatics* 29: 2277–2284.
- Bayzid M.S., Mirarab S., Boussau B., Warnow T. 2015. Weighted statistical binning: enabling statistically consistent genome-scale phylogenetic analyses (N Cellinese, Ed.). *PLoS ONE* 10: e0129183.
- 620 Bergsten J. 2005. A review of long-branch attraction. *Cladistics* 21: 163–193.
- Bergthorsson U., Adams K.L., Thomason B., Palmer J.D. 2003. Widespread horizontal transfer of mitochondrial genes in flowering plants. *Nature* 424: 197–201.

- Betancur-R. R., Naylor G.J.P., Ortí G. 2014. Conserved genes, sampling error, and phylogenomic inference. *Syst. Biol.* 63: 257–262.
- 625 Blischak P.D., Wenzel A.J., Wolfe A.D. 2014. Gene prediction and annotation in *Penstemon* (Plantaginaceae): a workflow for marker development from extremely low-coverage genome sequencing. *Appl. Plant Sci.* 2: 1400044.
- Brandley M.C., Bragg J.G., Singhal S., Chapple D.G., Jennings C.K., Lemmon A.R., Lemmon E.M., Thompson M.B., Moritz C. 2015. Evaluating the performance of anchored hybrid  
630 enrichment at the tips of the tree of life: a phylogenetic analysis of Australian *Eugongylus* group scincid lizards. *BMC Evol. Biol.* 15: 14.
- Buddenhagen C., Lemmon A.R., Lemmon E.M., Bruhl J., Cappa J., Clement W.L., Donoghue M.J., Edwards E.J., Hipp A., Kortyna M., Mitchell N., Prychid C., Simmons M.P., Soltis P.,  
635 Wanke S., Mast A. **In prep.** Anchored Phylogenomics of Angiosperms I: Assessing the Robustness of Phylogenetic Estimates. bioRxiv doi: 10.1101/086298
- Castresana J. 2000. Selection of conserved blocks from multiple alignments for their use in phylogenetic analysis. *Mol. Biol. Evol.* 17: 540–552.
- Chamala S., García N., Godden G.T., Krishnakumar V., Jordon-Thaden I.E., Smet R.D., Barbazuk  
640 W.B., Soltis D.E., Soltis P.S. 2015. MarkerMiner 1.0: a new application for phylogenetic marker development using angiosperm transcriptomes. *Appl. Plant Sci.* 3: 1400115.
- Chiari Y., Cahais V., Galtier N., Delsuc F. 2012. Phylogenomic analyses support the position of turtles as the sister group of birds and crocodiles (Archosauria). *BMC Biol.* 10: 65.
- Chou J., Gupta A., Yaduvanshi S., Davidson R., Nute M., Mirarab S., Warnow T. 2015. A  
645 comparative study of SVDquartets and other coalescent-based species tree estimation methods. *BMC Genom.* 16: S2.
- Comer J.R., Zomlefer W.B., Barrett C.F., Stevenson D.W., Heyduk K., Leebens-Mack J.H. 2016. Nuclear phylogenomics of the palm subfamily Arecoideae (Arecaceae). *Mol. Phyogenet. Evol.* 97: 32–42.



- 650 Croizat L. 1952. Manual of phytogeography. The Hague (Netherlands): W. Junk. 587 p.
- Cronn R., Knaus B.J., Liston A., Maughan P.J., Parks M., Syring J.V., Udall J. 2012. Targeted enrichment strategies for next-generation plant biology. *Am. J. Bot.* 99: 291–311.
- Degnan J.H., Rosenberg N.A. 2006. Discordance of species trees with their most likely gene trees. *PLoS Genet.* 2: e68.
- 655 Eaton D.A.R., Ree R.H. 2013. Inferring phylogeny and introgression using RADseq data: an example from flowering plants (*Pedicularis*: Orobanchaceae). *Syst. Biol.* 62: 689–706.
- Escudero M., Hipp A. 2013. Shifts in diversification rates and clade ages explain species richness in higher-level sedge taxa (Cyperaceae). *Am. J. Bot.* 100: 2403–2411.
- Escudero M., Eaton D.A.R., Hahn M., Hipp A.L. 2014. Genotyping-by-sequencing as a tool to  
660 infer phylogeny and ancestral hybridization: a case study in *Carex* (Cyperaceae). *Mol. Phylogenet. Evol.* 79: 359–367.
- Eytan R.I., Evans B.R., Dornburg A., Lemmon A.R., Lemmon E.M., Wainwright P.C., Near T.J. 2015. Are 100 enough? Inferring acanthomorph teleost phylogeny using Anchored Hybrid Enrichment. *BMC Evol. Biol.* 15: 20.
- 665 de Sousa F., Bertrand Y.J.K., Nylinder S., Oxelman B., Eriksson J.S., Pfeil B.E. 2014. Phylogenetic properties of 50 nuclear loci in *Medicago* (Leguminosae) generated using multiplexed sequence capture and next-generation sequencing. *PLoS ONE* 9: e109704.
- Faircloth B.C., McCormack J.E., Crawford N.G., Harvey M.G., Brumfield R.T., Glenn T.C. 2012. Ultraconserved elements anchor thousands of genetic markers spanning multiple evolutionary  
670 timescales. *Syst. Biol.* 61: 717–726.
- Feliner G.N., Rosselló J.A. 2007. Better the devil you know? Guidelines for insightful utilization of nrDNA ITS in species-level evolutionary studies in plants. *Mol. Phylogenet. Evol.* 44: 911–919.
- Felsenstein J. 1978. Cases in which parsimony or compatibility methods will be positively  
675 misleading. *Syst. Biol.* 27: 401–410.

- Felsenstein J. 1985. Confidence limits on phylogenies: an approach using the bootstrap. *Evolution* 39: 783–791.
- Fisher A.E., Hasenstab K.M., Bell H.L., Blaine E., Ingram A.L., Columbus J.T. 2016. Evolutionary history of chloridoid grasses estimated from 122 nuclear loci. *Mol. Phylogenet. Evol.* 105:1–14.
- 680
- Gardner M.G., Fitch A.J., Bertozzi T., Lowe A.J. 2011. Rise of the machines - recommendations for ecologists when using next generation sequencing for microsatellite development. *Mol. Ecol. Resour.* 11: 1093–1101.
- Gilmour C.N., Starr J.R., Naczi R.F.C. 2013. *Calliscirpus*, a new genus for two narrow endemics of the California Floristic Province, *C. criniger* and *C. brachythrix* sp. nov. (Cyperaceae). *Kew Bull.* 68: 84–105.
- 685
- Goetghebeur P. 1998. Cyperaceae. The families and genera of vascular plants. In: Kubitzki, K. (Ed.) *Flowering plants, Monocotyledons*: Alismatanae and Commelinanae (except Gramineae). New York: Springer. p. 141–190.
- 690
- Gonen S., Bishop S.C., Houston R.D. 2015. Exploring the utility of cross-laboratory RAD-sequencing datasets for phylogenetic analysis. *BMC Res. Notes* 8: 299.
- Gonzalez L.A. 2014. Phylogenetics and mating system evolution in the Southern South American *Valeriana* (Valerianaceae). M.Sc. Thesis, University of New Orleans. 46 p.
- Graham S.W., Olmstead R.G., Barrett S.C.H. 2002. Rooting phylogenetic trees with distant outgroups: a case study from the Commelinoid monocots. *Mol. Biol. Evol.* 19: 1769–1781.
- 695
- Greilhuber J, Borsch T, Müller K, Worberg A, Porembski S, Barthlott W. 2006. Smallest angiosperm genomes found in lentibulariaceae, with chromosomes of bacterial size. *Plant Biol.* 8: 770–777.
- Hedtke S.M., Townsend T.M., Hillis D.M. 2006. Resolution of phylogenetic conflict in large data sets by increased sampling. *Syst. Biol.* 55: 522–529.
- 700

- Heyduk K., Trapnell D.W., Barrett C.F., Leebens-Mack J. 2016. Phylogenomic analyses of species relationships in the genus *Sabal* (Arecaceae) using targeted sequence capture. *Biol. J. Linn. Soc.* 117: 106–120.
- Hillis D.M. 1987. Molecular versus morphological approaches to systematics. *Ann. Rev. Ecol. Syst.* 18: 23–42.
- Hillis D.M., Wiens J.J. 2000. Molecules versus morphology in systematics: conflicts, artifacts, and misconceptions. *Phylogenetic analysis of morphological data*. Washington (United-States): Smithsonian Institution Press, 1–19.
- Hipp A.L., Rothrock P., Roalson E. 2009. The evolution of chromosome arrangements in *Carex* (Cyperaceae). *Bot. Rev.* 75: 96–109.
- Hipp A.L., Eaton D.A.R., Cavender-Bares J., Fitzek E., Nipper R., Manos P.S. 2014. A framework phylogeny of the american oak clade based on sequenced RAD data (S Joly, Ed.). *PLoS ONE* 9: e93975.
- Hoot S.B., Taylor W.C. 2001. The utility of nuclear ITS, a LEAFY homolog intron, and chloroplast atpB-rbcL spacer region data in phylogenetic analyses and species delimitation in *Isoetes*. *Am. Fern J.* 91: 166–177.
- Huang H., Knowles L.L. 2016. Unforeseen consequences of excluding missing data from next-generation sequences: simulation study of RAD sequences. *Syst. Biol.* 65: 357–365.
- Hughes C.E., Eastwood R.J., Donovan Bailey C. 2006. From famine to feast? Selecting nuclear DNA sequence loci for plant species-level phylogeny reconstruction. *Philos. Trans. R. Soc. B: Biol. Sci.* 361: 211–225.
- Johnson M.G., Gardner E.M., Liu Y., Medina R., Goffinet B., Shaw A.J., Zerega N.J.C., Wickett N.J. 2016. HybPiper: extracting coding sequence and introns for phylogenetics from high-throughput sequencing reads using target enrichment. *Appl. in Plant Sci.* 4:1600016.
- Johnson M.T.J., Carpenter E.J., Tian Z., Bruskiwich R., Burriss J.N., Carrigan C.T., Chase M.W., Clarke N.D., Covshoff S., dePamphilis C.W., Edger P.P., Goh F., Graham S., Greiner S., Hibberd J.M., Jordon-Thaden I., Kutchan T.M., Leebens-Mack J., Melkonian M., Miles N.,

- Myburg H., Patterson J., Pires J.C., Ralph P., Rolf M., Sage R.F., Soltis D., Soltis P., Stevenson D., Stewart C.N., Surek B., Thomsen C.J.M., Villarreal J.C., Wu X., Zhang Y., Deyholos M.K., Wong G.K.-S. 2012. Evaluating methods for isolating total RNA and predicting the success of sequencing phylogenetically diverse plant transcriptomes. *PLoS ONE* 7: e50226.
- 730 Jung J., Choi H.-K. 2012. Recognition of two major clades and early diverged groups within the subfamily Cyperoideae (Cyperaceae) including Korean sedges. *J. Plant Res.* 126: 1–15.
- Katoh K., Standley D.M. 2013. MAFFT multiple sequence alignment software version 7: improvements in performance and usability. *Mol. Biol. Evol.* 30: 772–780.
- 735 Kearse M., Moir R., Wilson A., Stones-Havas S., Cheung M., Sturrock S., Buxton S., Cooper A., Markowitz S., Duran C., Thierer T., Ashton B., Meintjes P., Drummond A. 2012. Geneious Basic: an integrated and extendable desktop software platform for the organization and analysis of sequence data. *Bioinformatics* 28: 1647–1649.
- 740 Knoop V. 2004. The mitochondrial DNA of land plants: peculiarities in phylogenetic perspective. *Curr. Genet.* 46: 123–139.
- Kobert K., Salichos L., Rokas A., Stamatakis A. 2015. Computing the internode certainty and related measures from partial gene trees. *bioRxiv*.
- Lanfear R., Calcott B., Ho S.Y.W., Guindon S. 2012. PartitionFinder: combined selection of partitioning schemes and substitution models for phylogenetic analyses. *Mol. Biol. Evol.* 29: 1695–1701.
- 745 Lanfear R., Calcott B., Kainer D., Mayer C., Stamatakis A. 2014. Selecting optimal partitioning schemes for phylogenomic datasets. *BMC Evol. Biol.* 14: 82.
- Leaché A.D., Wagner P., Linkem C.W., Böhme W., Papenfuss T.J., Chong R.A., Lavin B.R., Bauer A.M., Nielsen S.V., Greenbaum E., Rödel M.-O., Schmitz A., LeBreton M., Ineich I., Chirio L., Ofori-Boateng C., Eniang E.A., Baha El Din S., Lemmon A.R., Burbrink F.T. 2014. A hybrid phylogenetic–phylogenomic approach for species tree estimation in African *Agama* lizards with applications to biogeography, character evolution, and diversification. *Mol. Phylogenet. Evol.* 79: 215–230.

- 755 Lemmon A.R., Emme S.A., Lemmon E.M. 2012. Anchored hybrid enrichment for massively high-throughput phylogenomics. *Syst. Biol.* 61: 727–744.
- Lemmon E.M., Lemmon A.R. 2013. High-throughput genomic data in systematics and phylogenetics. *Ann. Rev. Ecol. Evol. Syst.* 44: 99–121.
- Léveillé-Bourret É., Gilmour C.N., Starr J.R., Naczi R.F.C., Spalink D., Systma K.J. 2014. 760 Searching for the sister to sedges (*Carex*): resolving relationships in the Cariceae-Dulichieae-Scirpeae clade (Cyperaceae). *Bot. J. Linn. Soc.* 176: 1–21.
- Léveillé-Bourret É., Donadío S., Gilmour C.N., Starr J.R. 2015. *Rhodoscirpus* (Cyperaceae: Scirpeae), a new South American sedge genus supported by molecular, morphological, anatomical and embryological data. *Taxon* 64: 931–944.
- 765 Lyons-Weiler J., Hoelzer G.A, Tausch R.J. 1998. Optimal outgroup analysis. *Biol. J. Linn. Soc.* 64: 493–511.
- Ma P.-F., Zhang Y.-X., Zeng C.-X., Guo Z.-H., Li D.-Z. 2014. Chloroplast phylogenomic analyses resolve deep-level relationships of an intractable bamboo tribe Arundinarieae (Poaceae). *Syst. Biol.* 63: 933–950.
- 770 Mandel J.R., Dikow R.B., Funk V.A., Masalia R.R., Staton S.E., Kozik A., Michelmore R.W., Rieseberg L.H., Burke J.M. 2014. A target enrichment method for gathering phylogenetic information from hundreds of loci: an example from the Compositae. *App. Plant Sci.* 2: 1300085.
- Mason-Gamer R.J., Weil C.F., Kellogg E.A. 1998. Granule-bound starch synthase: structure, 775 function, and phylogenetic utility. *Mol. Biol. Evol.* 15: 1658–1673.
- Massatti R., Reznicek A.A., Knowles L.L. 2016. Utilizing RADseq data for phylogenetic analysis of challenging taxonomic groups: a case study in *Carex* sect. *Racemosae*. *Am. J. Bot.* 103: 337–347.
- Mastretta-Yanes A., Arrigo N., Alvarez N., Jorgensen T.H., Piñero D., Emerson B.C. 2015. 780 Restriction site-associated DNA sequencing, genotyping error estimation and de novo

- assembly optimization for population genetic inference. *Molecular Ecology Resources* 15: 28–41.
- Meiklejohn K.A., Faircloth B.C., Glenn T.C., Kimball R.T., Braun E.L. 2016. Analysis of a rapid evolutionary radiation using ultraconserved elements: evidence for a bias in some multispecies  
785 coalescent methods. *Syst. Biol.* 65:612–627.
- Meyer M., Kircher M. 2010. Illumina sequencing library preparation for highly multiplexed target capture and sequencing. *Cold Spring Harbor Protocols* 2010: pdb.prot5448-prot5448.
- Miller M.A., Pfeiffer W., Schwartz T. 2010. Creating the CIPRES Science Gateway for inference  
790 of large phylogenetic trees. *Proceedings of the Gateway Computing Environments Workshop (GCE)*. New Orleans, 1–8.
- Mirarab S., Reaz R., Bayzid M.S., Zimmermann T., Swenson M.S., Warnow T. 2014. ASTRAL: genome-scale coalescent-based species tree estimation. *Bioinformatics* 30: i541–i548.
- Mirarab S., Warnow T. 2015. ASTRAL-II: coalescent-based species tree estimation with many hundreds of taxa and thousands of genes. *Bioinformatics* 31: i44–i52.
- 795 Mirarab S., Bayzid M.S., Warnow T. 2016. Evaluating summary methods for multilocus species tree estimation in the presence of incomplete lineage sorting. *Syst. Biol.* 65: 366–380.
- Mitchell N., Lewis P.O., Lemmon E.M., Lemmon A.R., Holsinger K.E. 2017. Anchored phylogenomics improves the resolution of evolutionary relationships in the rapid radiation of *Protea* L. *Am. J. Bot.* Online first.
- 800 Muasya A.M., Simpson D.A., Chase M.W., Chulham A. 1998. An assessment of suprageneric phylogeny in Cyperaceae using *rbcL* DNA sequences. *Plant Systematics and Evolution* 211: 257–271.
- Muasya A.M., Simpson D.A., Verboom G.A., Goetghebeur P., Naczi R.F.C., Chase M.W., Smets E. 2009. Phylogeny of Cyperaceae based on DNA sequence data: current progress and future  
805 prospects. *Bot. Rev.* 75: 2–21.

- Nguyen L.-T., Schmidt H.A., von Haeseler A., Minh B.Q. 2015. IQ-TREE: a fast and effective stochastic algorithm for estimating maximum-likelihood phylogenies. *Mol. Biol. Evol.* 32: 268–274.
- Nicholls J.A., Pennington R.T., Koenen E.J.M., Hughes C.E., Hearn J., Bunnefeld L., Dexter  
810 K.G., Stone G.N., Kidner C.A. 2015. Using targeted enrichment of nuclear genes to increase phylogenetic resolution in the neotropical rain forest genus *Inga* (Leguminosae: Mimosoideae). *Frontiers in Plant Science* 6: 1–20.
- Ogilvie H.A., Heled J., Xie D., Drummond A.J. 2016. Computational performance and statistical accuracy of \*BEAST and comparisons with other methods. *Syst. Biol.* 65: 381–396.
- 815 Palmer J.D., Herbon L.A. 1988. Plant mitochondrial DNA evolved rapidly in structure, but slowly in sequence. *Journal of Molecular Evolution* 28: 87–97.
- Paradis E., Claude J., Strimmer K. 2004. APE: analyses of phylogenetics and evolution in R language. *Bioinformatics* 20: 289–290.
- Pellicer J., Fay M.F., Leitch I.J. 2010. The largest eukaryotic genome of them all? *Bot. J. Linn. Soc.* 164: 10–15.  
820
- Peloso P.L.V., Frost D.R., Richards S.J., Rodrigues M.T., Donnellan S., Matsui M., Raxworthy C.J., Biju S.D., Lemmon E.M., Lemmon A.R., Wheeler W.C. 2015. The impact of anchored phylogenomics and taxon sampling on phylogenetic inference in narrow-mouthed frogs (Anura, Microhylidae). *Cladistics Early View*: 28.
- 825 Philippe H., Brinkmann H., Lavrov D.V., Littlewood D.T.J., Manuel M., Wörheide G., Baurain D. 2011. Resolving difficult phylogenetic questions: why more sequences are not enough (D Penny, Ed.). *PLoS Biology* 9: e1000602.
- Prum R.O., Berv J.S., Dornburg A., Field D.J., Townsend J.P., Lemmon E.M., Lemmon A.R. 2015. A comprehensive phylogeny of birds (Aves) using targeted next-generation DNA  
830 sequencing. *Nature*.
- Pyron R.A., Hendry C.R., Chou V.M., Lemmon E.M., Lemmon A.R., Burbrink F.T. 2014. Effectiveness of phylogenomic data and coalescent species-tree methods for resolving difficult



- nodes in the phylogeny of advanced snakes (Serpentes: Caenophidia). *Mol. Phylogenet. Evol.* 81: 221–231.
- 835 Pyron R.A., Hsieh F.W., Lemmon A.R., Lemmon E.M., Hendry C.R. 2016. Integrating phylogenomic and morphological data to assess candidate species-delimitation models in brown and red-bellied snakes (*Storeria*). *Zoological Journal of the Linnean Society* Early View.
- R Core Team (2016). R: A language and environment for statistical computing. R Foundation for  
840 Statistical Computing, Vienna, Austria. URL: <https://www.R-project.org/>
- Ree R.H., Hipp A.L. 2015. Inferring phylogenetic history from restriction site associated DNA (RADseq). In: Hörandl E. Appelhans M.S, ed. *Regnum Vegetabile. Next-generation sequencing in plant systematics*. Königstein (Germany): Koeltz Scientific Books, 181–204.
- Richardson A.O., Palmer J.D. 2006. Horizontal gene transfer in plants. *Journal of Experimental*  
845 *Botany* 58: 1–9.
- Rieseberg L.H., Carter R., Zona S. 1990. Molecular tests of the hypothesized hybrid origin of two diploid *Helianthus* species (Asteraceae). *Evolution* 44: 1498.
- Rokyta D.R., Lemmon A.R., Margres M.J., Aronow K. 2012. The venom-gland transcriptome of the eastern diamondback rattlesnake (*Crotalus adamanteus*). *BMC Genomics* 13: 312.
- 850 Ruane S., Raxworthy C.J., Lemmon A.R., Lemmon E.M., Burbrink F.T. 2015. Comparing species tree estimation with large anchored phylogenomic and small Sanger-sequenced molecular datasets: an empirical study on Malagasy pseudoxyrhophiine snakes. *BMC Evol. Biol.* 15: 14.
- Rubin B.E.R., Ree R.H., Moreau C.S. 2012. Inferring phylogenies from RAD sequence data (S-O Kolokotronis, Ed.). *PLoS ONE* 7: e33394.
- 855 Salichos L., Stamatakis A., Rokas A. 2014. Novel information theory-based measures for quantifying incongruence among phylogenetic trees. *Mol. Biol. Evol.* 31: 1261–1271.
- Sarkar I.N., Egan M.G, Coruzzi G, Lee E.K., DeSalle R. 2008. Automated simultaneous analysis phylogenetics (ASAP): an enabling tool for phylogenomics. *BMC Bioinformatics* 9: 103.



- Schmickl R., Liston A., Zeisek V., Oberlander K., Weitemier K., Straub S.C.K., Cronn R.C.,  
860 Dreyer L.L., Suda J. 2016. Phylogenetic marker development for target enrichment from transcriptome and genome skim data: the pipeline and its application in southern African *Oxalis* (Oxalidaceae). *Mol. Ecol. Resour.* 16:1124–1135.
- Scotland R.W., Olmstead R.G., Bennett J.R. 2003. Phylogeny reconstruction: the role of morphology. *Syst. Biol.* 52: 539–548.
- 865 Simmons M.P., Freudenstein J.V. 2011. Spurious 99% bootstrap and jackknife support for unsupported clades. *Mol. Phylogenet. Evol.* 61: 177–191.
- Spalink D., Drew B.T., Pace M.C., Zaborsky J.G., Starr J.R., Cameron K.M., Givnish T.J., Sytsma K.J. 2016. Biogeography of the cosmopolitan sedges (Cyperaceae) and the area-richness correlation in plants. *Journal of Biogeography Online Advance Access.*
- 870 Stamatakis A., Blagojevic F., Nikolopoulos D.S., Antonopoulos C.D. 2007. Exploring new search algorithms and hardware for phylogenetics; RAxML meets the IBM cell. *The Journal of VLSI Signal Processing Systems for Signal, Image, and Video Technology* 48: 271–286.
- Stamatakis A. 2014. RAxML version 8: a tool for phylogenetic analysis and post-analysis of large phylogenies. *Bioinformatics* 30: 1312–1313.
- 875 Starr J.R., Naczi R.F.C., Chouinard B.N. 2009. Plant DNA barcodes and species resolution in sedges (*Carex*, Cyperaceae). *Molecular Ecology Resources* 9: 151–163.
- Starr J.R., Janzen F.H., Ford B.A. 2015. Three new, early diverging *Carex* (Cariceae, Cyperaceae) lineages from East and Southeast Asia with important evolutionary and biogeographic implications. *Mol. Phylogenet. Evol.* 88: 105–120.
- 880 Stephens J.D., Rogers W.L., Heyduk K., Cruse-Sanders J.M., Determann R.O., Glenn T.C., Malmberg R.L. 2015. Resolving phylogenetic relationships of the recently radiated carnivorous plant genus *Sarracenia* using target enrichment. *Mol. Phylogenet. Evol.* 85: 76–87.

- 885 Straub S.C.K., Parks M., Weitemier K., Fishbein M., Cronn R.C., Liston A. 2012. Navigating the  
tip of the genomic iceberg: Next-generation sequencing for plant systematics. *Am. J. Bot.* 99:  
349–364.
- 890 Straub S.C.K., Moore M.J., Soltis P.S., Soltis D.E., Liston A., Livshultz T. 2014. Phylogenetic  
signal detection from an ancient rapid radiation: effects of noise reduction, long-branch  
attraction, and model selection in crown clade Apocynaceae. *Mol. Phylogenet. Evol.* 80: 169–  
185.
- Swofford D.L. 2002. PAUP: Phylogenetic analysis using parsimony \*and other methods: Version  
4.0 beta. Sunderland, Massachusetts: Sinauer Associates.
- Taberlet P., Gielly L., Pautou G., Bouvet J. 1991. Universal primers for amplification of three  
non-coding regions of chloroplast DNA. *Plant Molecular Biology* 17: 1105–1109.
- 895 Townsend J.P., Su Z., Tekle Y.I. 2012. Phylogenetic signal and noise: predicting the power of a  
data set to resolve phylogeny. *Syst. Biol.* 61: 835–849.
- Warnow T. 2015. Concatenation analyses in the presence of incomplete lineage sorting. *PLoS  
Curr.* 7.
- 900 Weitemier K., Straub S.C.K., Cronn R.C., Fishbein M., Schmickl R., McDonnell A., Liston A.  
2014. Hyb-Seq: combining target enrichment and genome skimming for plant phylogenomics.  
*Appl. Plant Sci.* 2:1400042.
- Wen J., Xiong Z., Nie Z.-L., Mao L., Zhu Y., Kan X.-Z., Ickert-Bond S.M., Gerrath J., Zimmer  
E.A., Fang X.-D. 2013. Transcriptome sequences resolve deep relationships of the grape  
family. *PLoS ONE* 8: e74394.
- 905 Wheeler W.C. 1990. Nucleic acid sequence phylogeny and random outgroups. *Cladistics* 6: 363–  
367.
- White T.J., Bruns T., Lee S., Taylor J. 1990. Amplification and direct sequencing of fungal  
ribosomal RNA genes for phylogenetics. In: Innis M.A., Gelfand D.H., Sninsky J.J., White  
T.J. (Eds.) *PCR protocols: a guide to methods and applications*. New York: Academic Press.  
910 p. 315–322.

- Whitfield J.B., Lockhart P.J. 2007. Deciphering ancient rapid radiations. *Trends Ecol. Evol.* 22: 258–265.
- Wicke S., Schneeweiss G.M. 2015. Next generation organellar genomics. In: Hörandl E, Appelhans M.S. e(Ed.) *Regnum Vegetabile. Next-generation sequencing in plant systematics.* 915 Königstein (Germany): Koeltz Scientific Books. p. 9–50.
- Wilberg E.W. 2015. What’s in an outgroup? The impact of outgroup choice on the phylogenetic position of *Thalattosuchia* (Crocodylomorpha) and the origin of Crocodyliformes. *Syst. Biol.* 64: 621–637.
- Xi Z., Ruhfel B.R., Schaefer H., Amorim A.M., Sugumaran M., Wurdack K.J., Endress P.K., 920 Matthews M.L., Stevens P.F., Mathews S., Davis C.C. 2012. Phylogenomics and a posteriori data partitioning resolve the Cretaceous angiosperm radiation Malpighiales. *Proc. Natl. Acad. Sci.* 109: 17519–17524.
- Xi Z., Liu L., Davis C.C. 2015. Genes with minimal phylogenetic information are problematic for coalescent analyses when gene tree estimation is biased. *Mol. Phylogenet. Evol.* 92: 63–71.
- 925 Xia X., Xie Z., Salemi M., Chen L., Wang Y. 2003. An index of substitution saturation and its application. *Mol. Phylogenet. Evol.* 26: 1–7.
- Xia X., Lemey P. 2009. Assessing substitution saturation with DAMBE. In: Salemi M., Vandamme A.-M., Lemey P. (Eds.) *The phylogenetic handbook: a practical approach to phylogenetic analysis and hypothesis testing.* Cambridge: Cambridge University Press. p. 611–930 626.
- Xia X. 2013. DAMBE5: A Comprehensive Software Package for Data Analysis in *Mol. Biol. Evol.* 30: 1720–1728.

935 TABLE 1. Comparison of branch support measures for selected backbone branches (A-E; see Fig. 1). Branch length (expected changes per site in ML), internode certainty (ICA) based on estimated ML gene trees, ASTRAL bootstrap (BS), number of unambiguous synapomorphies, number of loci with positive and negative partitioned Bremer support, total Bremer support and proportion of hidden Bremer support.

| Branch | Branch length | ICA   | BS  | Unambiguous synapomorphies | Loci positive | Loci negative | Total Bremer | Proportion hidden Bremer |
|--------|---------------|-------|-----|----------------------------|---------------|---------------|--------------|--------------------------|
| A      | 0.0047        | 0.180 | 100 | 1404                       | 296           | 86            | 790          | (43%)                    |
| B      | 0.0023        | 0.066 | 99  | 646                        | 209           | 90            | 327          | (66%)                    |
| C      | 0.0014        | 0.006 | 68  | 304                        | 195           | 203           | 95           | (43%)                    |
| D      | 0.0058        | 0.380 | 100 | 1082                       | 299           | 48            | 921          | (57%)                    |
| E      | 0.0017        | 0.024 | 100 | 364                        | 195           | 202           | 137          | (42%)                    |

940           FIGURE 1. Best phylogenetic hypotheses for the CDS Clade, with the species tree  
estimated by ASTRAL using 461 NGS nuclear loci on the left, and the ML tree estimated using  
*matK* + *ndhF* + ETS-1f on the right (arrows indicate topological differences with the ASTRAL  
species tree). The smaller trees on either side represent relative ML branch lengths for each  
dataset. Branches without values have 100% support for all measures used. When at least one  
945 measure was <100%, the support values are reported above branches as follows: ASTRAL tree  
(bold italics: local posterior probability, normal text: ASTRAL multilocus bootstrap/ML  
bootstrap/MP jackknife) and ML tree (ML bootstrap/MP bootstrap). An asterisk (\*) indicates  
100% bootstrap support, and a dash (-) indicates less than 50% bootstrap support. Branch width is  
a function of support in parsimony. Letters under branches refer to clades in Table 1. Legend;  
950 Out: outgroups, DUL: Dulichieae, Kha: *Khaosokia*, Cal: Calliscirpus Clade, Zam: Zameioscirpus  
Clade, Sci: Scirpus Clade, Tri, Trichophorum Clade, CAR: Cariceae, Eri: Eriophorum Clade,  
Min: Minor Carex Alliance, Vig: *Carex* subg. *Vignea*, Uni: Unispicate Carex Clade, Car: Core  
Carex Clade. Scirpeae = Cal + Zam + Sci + Tri.

955           FIGURE 2. Negative relationship between average ML bootstrap of estimated gene trees  
and Robinson-Foulds distance between that gene tree and the ASTRAL species tree. Regression  
line estimated by standard linear regression.

960           FIGURE 3. Relative frequency of bipartitions of estimated gene trees as a function of their  
ML bootstrap support. Bipartitions compatible with the ASTRAL species tree in blue,  
incompatible in yellow, showing that most gene tree bipartitions are compatible with the species  
tree beyond about 80% BS.

          FIGURE 4. Results of reduced analyses, showing the distribution of Robinson-Foulds  
distance between reduced analyses tree and the best ASTRAL species tree, as a function of  
analytic method and number of loci. Note that since all trees were bifurcating, the Robinson-  
Foulds distance is equivalent to the proportion of conflicting nodes.

965 APPENDIX 1. Samples used for anchored phylogenomics.

| Species                                                  | DNA number | NGS number | Collectors                 | Collection number       | Herb. | Origin                      |
|----------------------------------------------------------|------------|------------|----------------------------|-------------------------|-------|-----------------------------|
| <i>Amphiscirpus nevadensis</i> (S.Watson) Oteng-Yeb.     | STA2640    | I8317      | Starr, Julian R.           | 1301-08                 | CAN   | Canada, British Columbia    |
| <i>Calliscirpus brachythrix</i> C.N.Gilmour              | STA2625    | I8333      | Starr, Julian R.           | 07-037                  | CAN   | United-States, California   |
| <i>Calliscirpus criniger</i> (A.Gray) C.N.Gilmour et al. | STA2629    | I8311      | Starr, Julian R.           | 10S-055 (P55-10)        | CAN   | United-States, California   |
| <i>Carex atrivaginata</i> Nelmes                         | STA2647    | I8330      | Ford & al.                 | 1241A                   | WIN   | Vietnam, Lao Cai            |
| <i>Carex bavicola</i> Raymond                            | STA2644    | I8327      | Ford & al.                 | 1220                    | WIN   | Vietnam, Hanoi              |
| <i>Carex camptoglochin</i> V.I.Krecz.                    | STA2656    | I8334      | Starr & al.                | 10-001                  | CAN   | Argentina, Tierra del Fuego |
| <i>Carex canescens</i> L.                                | STA2654    | I8332      | Starr                      | 10S-005 (P5-19)         | CAN   | United States, New Mexico   |
| <i>Carex capitata</i> Sol.                               | STA2653    | I8323      | Starr & Villaverde         | 10-023 (P18-27)         | CAN   | Argentina, Santa Cruz       |
| <i>Carex dimorpholepis</i> Steud.                        | STA2645    | I8328      | Ford & al.                 | 1240A                   | WIN   | Vietnam, Lao Cai            |
| <i>Carex filicina</i> Nees                               | STA2651    | I8321      | Ford & al.                 | 1229                    | WIN   | Vietnam, Lao Cai            |
| <i>Carex hypolytroides</i> Ridl.                         | STA2442    | I8306      | Ford & al.                 | 1255A                   | WIN   | Vietnam, Lao Cai            |
| <i>Carex kucyniakii</i> Raymond                          | STA2639    | I8316      | Ford & al.                 | 1258A                   | WIN   | Vietnam, Lao Cai            |
| <i>Carex microglochin</i> Wahlenb.                       | STA2658    | I8336      | Starr                      | 10S-035 (P35-1 & P35-4) | CAN   | United States, Colorado     |
| <i>Carex myosuroides</i> Vill.                           | STA2630    | I8312      | Starr                      | 10S-012 (P12-9)         | CAN   | United States, New Mexico   |
| <i>Carex myosurus</i> Nees                               | STA2636    | I8325      | Ford & al.                 | 1224                    | WIN   | Vietnam, Lao Cai            |
| <i>Carex nardina</i> (Hornem.) Fr.                       | STA2657    | I8335      | Starr                      | 10S-051 (P51-20)        | CAN   | United States, Utah         |
| <i>Carex phleoides</i> Cav.                              | STA2652    | I8322      | Starr & Villaverde Hidalgo | 10-026                  | CAN   | Argentina, Neuquén          |
| <i>Carex plantaginea</i> Lam.                            | STA0178    | I8304      | Bakowski                   | 96-174                  | WIN   | Canada, Ontario             |
| <i>Carex pulicaris</i> L.                                | STA0105    | I8303      | Starr & Scott              | 98001                   | FHO   | England, North Yorkshire    |
| <i>Carex siderosticta</i> Hance                          | STA2681    | I8337      | Léveillé-Bourret           | 545                     | CAN   | Garden                      |

*Léveillé-Bourret et al. 2016*

*Anchored phylogenomics resolves plant radiation*

|                                                                        |          |       |                     |                     |      |                               |
|------------------------------------------------------------------------|----------|-------|---------------------|---------------------|------|-------------------------------|
| <i>Carex speciosa</i> Kunth                                            | STA2646  | I8329 | Ford & al.          | 1236A               | WIN  | Vietnam, Lao Cai              |
| <i>Khaosokia caricoides</i><br>D.A.Simpson et al.                      | STA0387B | I8305 | Middleton & al.     | 4071                | MICH | Thailand, Surat Thani         |
| <i>Dulichium arundinaceum</i><br>Pers. var. <i>arundinaceum</i>        | STA2682  | I8338 | Starr               | 16-001              | OTT  | Canada, Québec                |
| <i>Eleocharis obtusa</i> (Willd.)<br>Schult.                           | STA2632  | I8314 | Bergeron            | 12-272              | MT   | Canada, Québec                |
| <i>Erioscirpus comosus</i><br>(Wall.) Palla                            | STA2648  | I8331 | Ford & al.          | 1269C               | WIN  | Vietnam, Ha Giang             |
| <i>Eriophorum angustifolium</i> Honck.                                 | STA2631  | I8313 | Starr               | 10S-011<br>(P11-2V) | CAN  | United States, New Mexico     |
| <i>Eriophorum vaginatum</i><br>subsp. <i>spissum</i> (Fern.)<br>Hultén | STA2634  | I8324 | Léveillé-Bourret    | 632                 | DAO  | Canada, Ontario               |
| <i>Eriophorum virginicum</i> L.                                        | STA2608  | I8308 | Léveillé-Bourret    | 633                 | DAO  | Canada, Ontario               |
| <i>Scirpus atrovirens</i> Willd.                                       | STA2567  | I8307 | Léveillé-Bourret    | 610                 | DAO  | Canada, Québec                |
| <i>Scirpus atrovirens</i> Willd.                                       | STA2638  | I8326 | Léveillé-Bourret    | 609                 | DAO  | Canada, Québec                |
| <i>Scirpus cyperinus</i> (L.)<br>Kunth                                 | STA2609  | I8309 | Léveillé-Bourret    | 634                 | DAO  | Canada, Ontario               |
| <i>Scirpus pendulus</i> Muhl.                                          | STA2643  | I8319 | Léveillé-Bourret    | 611                 | DAO  | Canada, Québec                |
| <i>Scirpus rosthornii</i> Diels                                        | STA2650  | I8320 | Ford & al.          | 1223A               | WIN  | Vietnam, Lao Cai              |
| <i>Trichophorum alpinum</i><br>(L.) Pers.                              | STA2633  | I8315 | Garon-<br>Labrecque | 129                 | MT   | Canada, Northwest Territories |
| <i>Trichophorum cespitosum</i><br>(L.) Schur                           | STA2628  | I8310 | Garon-<br>Labrecque | 130                 | MT   | Canada, Northwest Territories |

APPENDIX 2. Samples and Genbank accession numbers used in the comparative Sanger-based analyses.

| Species                                                     | DNA number | Collectors        | Collection number          | Herb. | Origin                    | <i>matK</i>     | <i>ndhF</i>     | ETS-1f          |
|-------------------------------------------------------------|------------|-------------------|----------------------------|-------|---------------------------|-----------------|-----------------|-----------------|
| <i>Amphiscirpus nevadensis</i><br>(S.Watson) Oteng-Yeb.     | STA2141    | Hudson            | 5177                       | CAN   | Canada, Saskatchewan      | JX065075        | JX074631        | KP705256        |
| <i>Calliscirpus brachytrix</i><br>C.N.Gilmour               | STA2625    | Ahart & Oswald    | 5099                       | CHS   | United States, California | JX065078        | JX074634        | JX065112        |
| <i>Calliscirpus criniger</i> (A.Gray)<br>C.N.Gilmour et al. | STA2629    | Chambers          | 2973                       | DAO   | United States             | JX074655        | KJ513488        | JX065099        |
| <i>Carex atrivaginata</i><br>Nelmes                         | STA2419    | Ford & al.        | 1230A                      | WIN   | Vietnam, Lao Cai          | newly submitted | newly submitted | newly submitted |
| <i>Carex bavicola</i><br>Raymond                            | STA2389    | Ford & al.        | 1215B                      | WIN   | Vietnam, Hanoi            | KP273672        | KP273726        | KP273600        |
| <i>Carex camptoglochin</i><br>V.I.Krecz.                    | STA0027    | Molau & al.       | 2329                       | GB    | Ecuador, Chimborazo       | KJ513584        | KJ513492        | AY244520        |
| <i>Carex canescens</i><br>L.                                | -          | Kaantonen         | 156/94                     | H     | Finland                   | KP980061        | -               | -               |
| <i>Carex canescens</i><br>L.                                | -          | Bond              | s.n.                       | MTMG  | Canada, Québec            | -               | -               | AY757384        |
| <i>Carex capitata</i><br>Sol.                               | STA2653    | Starr & Thibeault | 6016                       | CAN   | United States             | KJ513585        | KJ513493        | -               |
| <i>Carex capitata</i><br>Sol.                               | STA1411    | Ford              | 02379                      | WIN   | Canada                    | -               | -               | DQ115119        |
| <i>Carex dimorpholepis</i><br>Steud.                        | STA2645    | [not available]   | MAK accession no. 99052601 | MAK   | Japan, Nara Pref.         | AB079435        | AB079422        | -               |
| <i>Carex filicina</i><br>Nees                               | STA2459    | Ford & al.        | 1247A                      | WIN   | Vietnam, Lao Cai          | KP273682        | KP273736        | KP273608        |
| <i>Carex hypolytroides</i><br>Ridl.                         | STA2442    | Ford & al.        | 1255A                      | WIN   | Vietnam, Lao Cai          | KP273688        | KP273742        | KP273610        |
| <i>Carex kucyniakii</i><br>Raymond                          | STA2351    | Ford & al.        | 1261A                      | WIN   | Vietnam, Lao Cai          | KP273693        | KP273747        | KP273615        |



*Léveillé-Bourret et al. 2016*

*Anchored phylogenomics resolves plant radiation*

|                                                |           |                  |               |                 |                             |          |          |          |
|------------------------------------------------|-----------|------------------|---------------|-----------------|-----------------------------|----------|----------|----------|
| <i>Carex microglochin</i> Wahlenb.             | STA2658   | Starr & al.      | 10-008 (P5-9) | CAN             | Argentina, Tierra del Fuego | KP273698 | KP273752 | -        |
| <i>Carex microglochin</i> Wahlenb.             | STA0106   | Starr & Scott    | 98017         | FHO             | Scotland, County of Perth   | -        | -        | AY244518 |
| <i>Carex myosuroides</i> Vill.                 | B1518     | Jones            | 146           | UBC             | Canada, British Columbia    | KJ513622 | KJ513529 | -        |
| <i>Carex myosuroides</i> Vill.                 | STA0101   | Playford & al.   | 9084          | FHO             | France, Hautes-Alpes/Savoie | -        | -        | AH012966 |
| <i>Carex myosurus</i> Nees                     | STA2456   | Ford & al.       | 1246A         | WIN             | Vietnam, Lao Cai            | KP273700 | KP273754 | KP273620 |
| <i>Carex nardina</i> (Hornem.) Fr.             | -         | Aiken & al.      | 86-091        | CAN             | Canada, Nunavut             | FJ548120 | -        | -        |
| <i>Carex nardina</i> (Hornem.) Fr.             | STA0839   | Ford & al.       | 02230         | WIN             | Canada, Manitoba            | -        | -        | DQ115221 |
| <i>Carex phleoides</i> Cav.                    | -         | Danton           | G-(1377)-1142 | [not available] | [not available]             | -        | AM999972 | -        |
| <i>Carex phleoides</i> Cav.                    | STA0034   | Vann             | s.n.          | FHO             | Chile, Chiloé               | -        | -        | AH010381 |
| <i>Carex plantaginea</i> Lam.                  | STA0178   | Waterway         | 2000.002      | MTMG            | Canada, Québec              | -        | -        | AY757674 |
| <i>Carex pulicaris</i> L.                      | STA0105   | Starr & Scott    | 98001         | FHO             | England, North Yorkshire    | KJ513590 | KJ513576 | AY242019 |
| <i>Carex siderosticta</i> Hance                | STA0733   | Léveillé-Bourret | 545           | CAN             | Garden                      | KJ513592 | KJ513499 | -        |
| <i>Carex siderosticta</i> Hance                | -         | Waterway         | 2004.268      | MTMG            | MTMG                        | -        | -        | DQ998892 |
| <i>Carex speciosa</i> Kunth                    | STA2417   | Ford & al.       | 1236A         | WIN             | Vietnam, Lao Cai            | KP273706 | KP273760 | KP273625 |
| <i>Khaosokia caricoides</i> D.A.Simpson et al. | STA0387 B | Middleton & al.  | 4071          | MICH            | Thailand, Surat Thani       | JX065087 | JX074643 | -        |
| <i>Dulichium arundinaceum</i>                  | STA0154   | Ford & Punter    | 94233         | FHO             | Canada, Manitoba            | JX065083 | JX074639 | -        |

|                                                                                                          |         |                      |       |     |                                |          |          |          |  |
|----------------------------------------------------------------------------------------------------------|---------|----------------------|-------|-----|--------------------------------|----------|----------|----------|--|
| <b>Pers. var.</b><br><b><i>arundinaceum</i></b>                                                          |         |                      |       |     |                                |          |          |          |  |
| <b><i>Dulichium</i></b><br><b><i>arundinaceum</i></b><br><b>Pers. var.</b><br><b><i>arundinaceum</i></b> | STA2469 | Bergeron<br>& al.    | 81113 | CAN | Canada,<br>Québec              | -        | -        | KP705281 |  |
| <b><i>Eleocharis</i></b><br><b><i>acicularis</i></b> (Willd.)<br>Schult.                                 | d484    | Fields               | 2583  | WIS | United<br>States,<br>Wisconsin | KJ513595 | KJ513502 | -        |  |
| <b><i>Erioscirpus</i></b><br><b><i>comosus</i></b> (Wall.)<br>Palla                                      | STA2092 | Hing & al.           | 22413 | A   | China,<br>Yunnan               | KJ513619 | KJ513526 | -        |  |
| <b><i>Erioscirpus</i></b><br><b><i>comosus</i></b> (Wall.)<br>Palla                                      | -       | Ikeda & al.          | 4032  | TI  | Nepal                          | -        | -        | KM462231 |  |
| <b><i>Eriophorum</i></b><br><b><i>angustifolium</i></b><br>Honck.                                        | STA1777 | Scoggan              | 10947 | CAN | Canada                         | KJ513597 | KJ513504 |          |  |
| <b><i>Eriophorum</i></b><br><b><i>angustifolium</i></b><br>Honck.                                        | STA2547 | Keleher              | 755   | CAN | Canada                         | -        | -        | KP705276 |  |
| <b><i>Eriophorum</i></b><br><b><i>vaginatum</i></b> subsp.<br><b><i>spissum</i></b> (Fern.)<br>Hultén    | STA1804 | Porsild              | 12    | CAN | Canada                         | KJ513614 | KJ513521 | -        |  |
| <b><i>Eriophorum</i></b><br><b><i>vaginatum</i></b> subsp.<br><b><i>spissum</i></b> (Fern.)<br>Hultén    | STA2607 | Léveillé-<br>Bourret | 632   | DAO | Canada                         | -        | -        | KP705278 |  |
| <b><i>Eriophorum</i></b><br><b><i>virginicum</i></b> L.                                                  | STA1807 | Dickson &<br>Brunton | 3214  | CAN | Canada                         | KJ513617 | KJ513524 | -        |  |
| <b><i>Eriophorum</i></b><br><b><i>virginicum</i></b> L.                                                  | STA2608 | Léveillé-<br>Bourret | 633   | DAO | Canada                         | -        | -        | KP705269 |  |
| <b><i>Scirpus atrovirens</i></b><br>Willd.                                                               | dS043   | Spalink              | 186   | WIS | United<br>States,<br>Ohio      | KJ513630 | KJ513537 | -        |  |
| <b><i>Scirpus cyperinus</i></b><br>(L.) Kunth                                                            | STA1777 | Lindsey              | 1025  | CAN | Canada,<br>Ontario             | JX065092 | JX074648 | -        |  |
| <b><i>Scirpus pendulus</i></b><br>Muhl.                                                                  | STA1878 | Cruise               | 1388  | CAN | Canada                         | KJ513649 | KJ513556 | -        |  |
| <b><i>Scirpus pendulus</i></b><br>Muhl.                                                                  | STA2569 | Léveillé-<br>Bourret | 611   | DAO | Canada                         | -        | -        | KP705270 |  |

*Léveillé-Bourret et al. 2016*

*Anchored phylogenomics resolves plant radiation*

|                                                  |         |                 |        |     |                             |                    |          |                    |
|--------------------------------------------------|---------|-----------------|--------|-----|-----------------------------|--------------------|----------|--------------------|
| <i>Scirpus rosthornii</i><br>Diels               | STA2437 | Ford & al.      | 1260A  | WIN | Vietnam,<br>Lao Cai         | newly<br>submitted | -        | newly<br>submitted |
| <i>Trichophorum<br/>alpinum</i> (L.) Pers.       | STA1815 | Spetzman        | 4941   | CAN | United<br>States,<br>Alaska | JX065093           | JX074649 | KP705266           |
| <i>Trichophorum<br/>cespitosum</i> (L.)<br>Schur | STA1819 | Aiken &<br>Iles | 02-048 | CAN | Canada,<br>Nunavut          | KJ513657           | KJ513564 | KP705267           |

---

970

ONLINE APPENDIX 1. Characteristics of loci used in anchored phylogenomics analyses after masking and trimming of alignments. AVE: average value for all loci, MIN: minimum value for all loci, MAX: maximum value for all loci, Locus#: locus identification number, New#: new  
975 number assigned to locus for this analysis (necessary because of paralogs), cov: average coverage across all species, ntax: number of taxa possessing the locus, flank%: percentage of total locus length estimated to be in the "flanking region", aveC: average number of copies of locus across species, before orthology filtering, maxC: maximum number of distinct copies of locus, before orthology filtering, len: alignment length, var: number of variable characters, pi: number of  
980 parsimony informative characters, GC%: percentage of GC across all non-gapped bases, amb%: percentage of ambiguous bases, miss%: percentage of missing data.

ONLINE APPENDIX 2. Saturation plot as calculated in DAMBE, showing GTR distance estimated for the  $\frac{1}{3}$  fastest-evolving sites in relation to the number of transitions and  
985 transversions at these sites. Regression lines (forced through the origin) and slope coefficients are shown. Dashed line indicates slope of 1.

ONLINE APPENDIX 3. Single shortest tree found in PAUP\* maximum parsimony searches. Support as MP jackknife, and ACCTRAN branch lengths.

ONLINE APPENDIX 4. Maximum likelihood tree in RAxML searches. Support as ML  
990 bootstrap.

# 461 nuclear genes

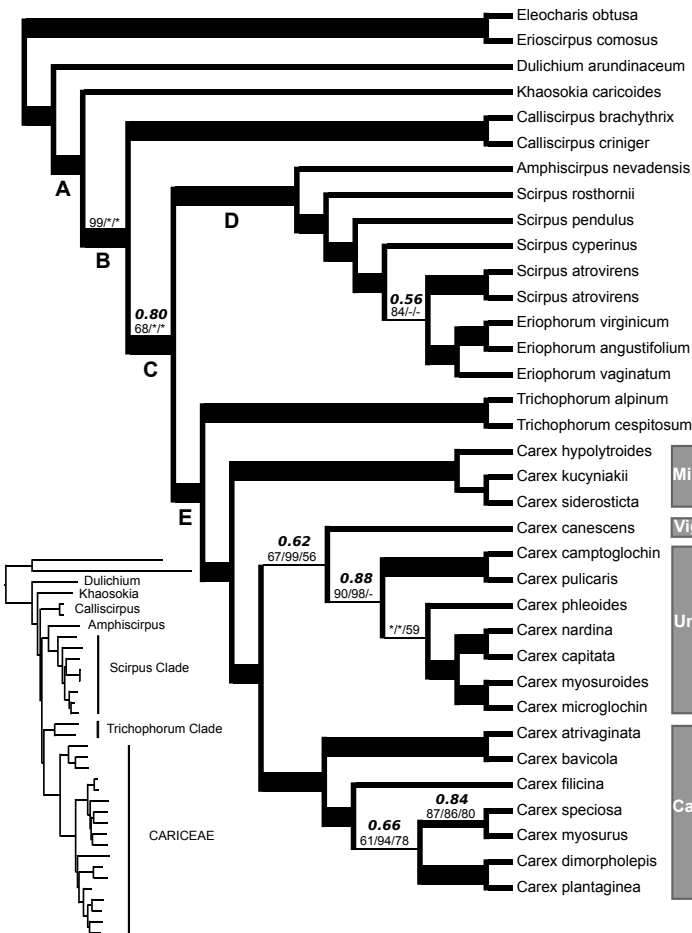

# matK + ndhF + ETS-1f

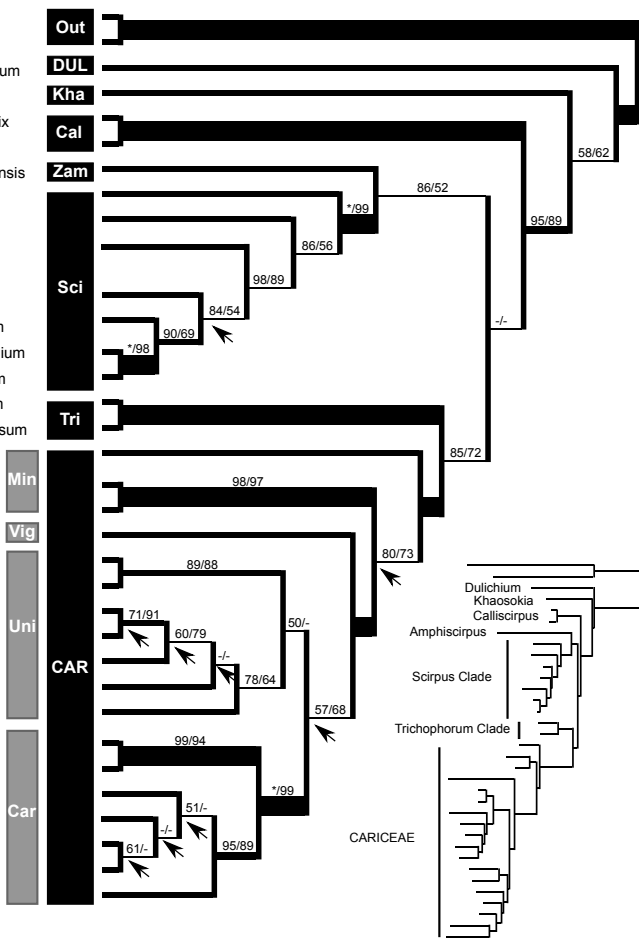

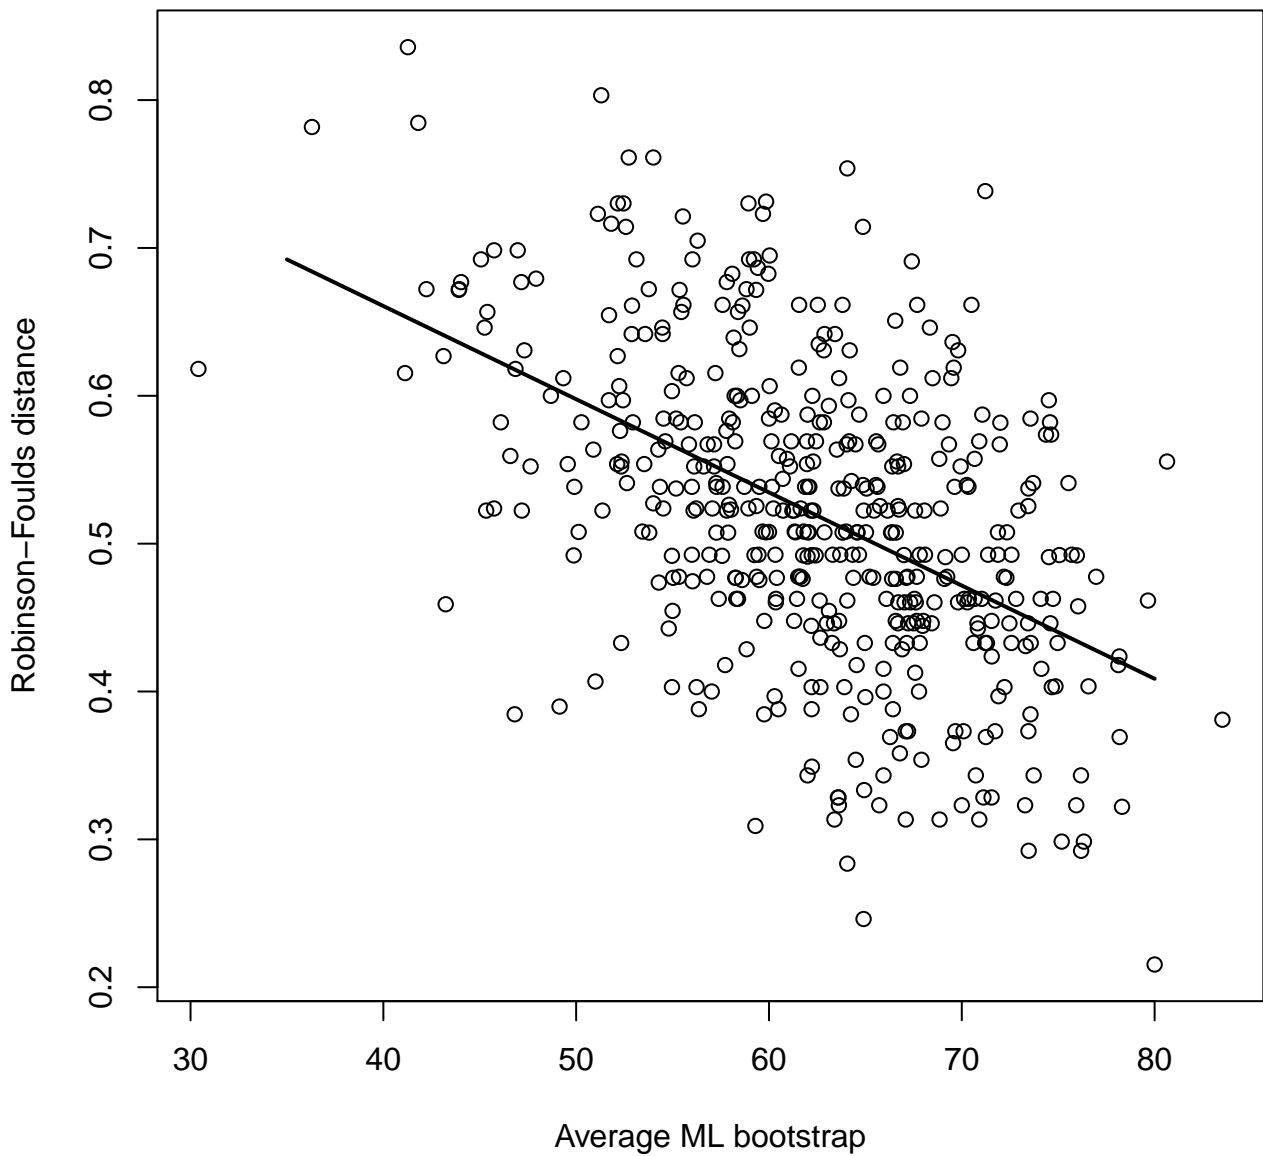

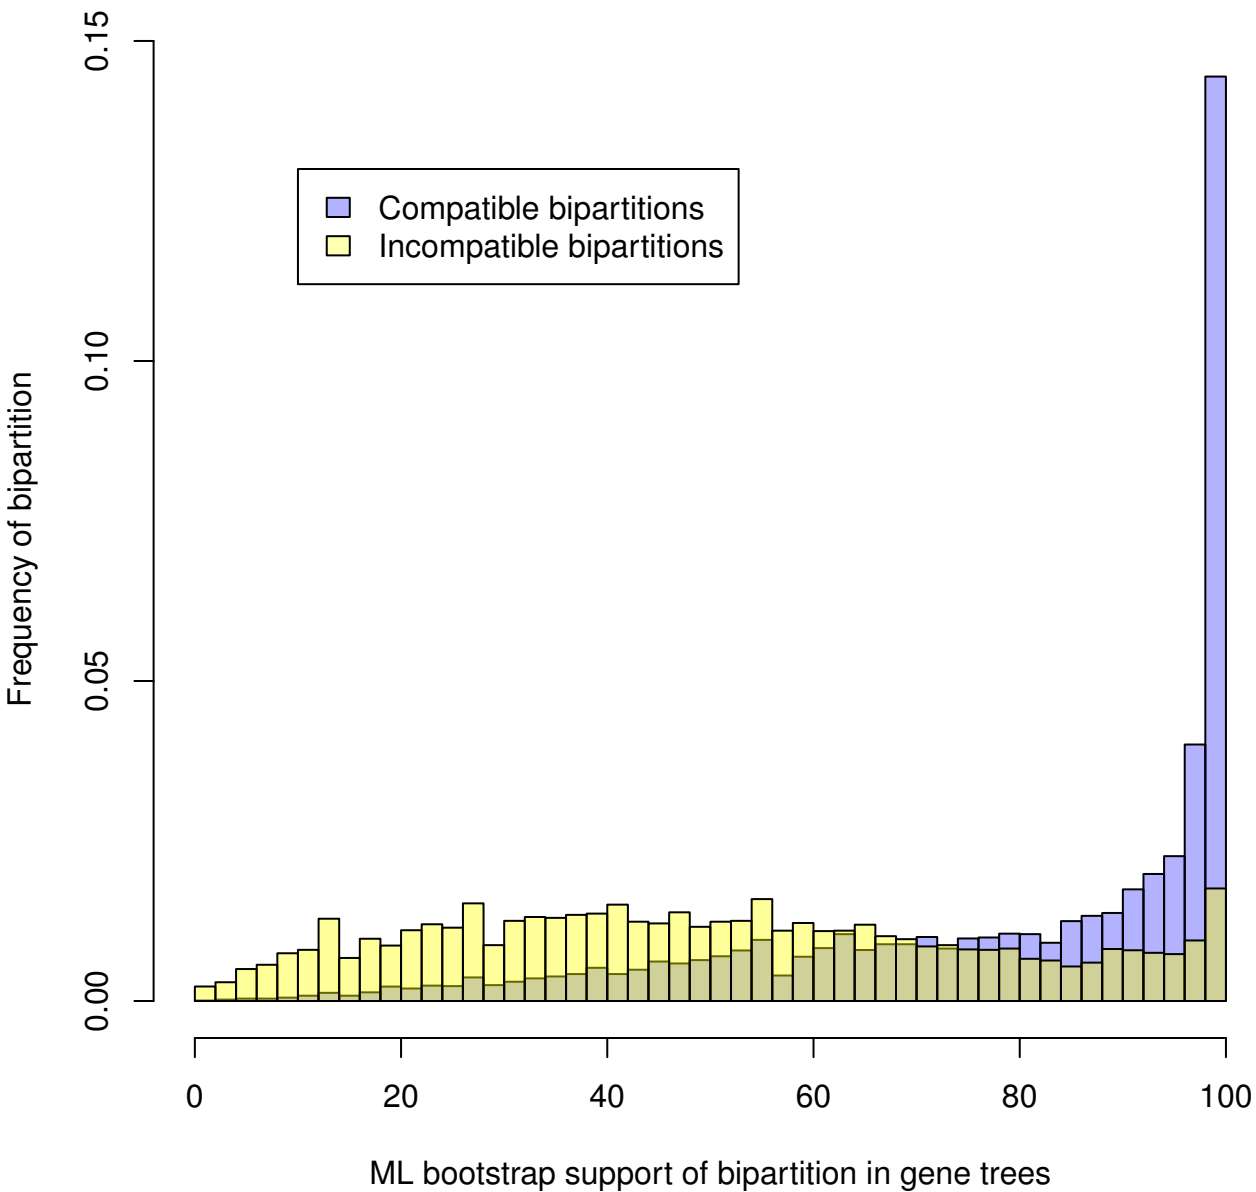

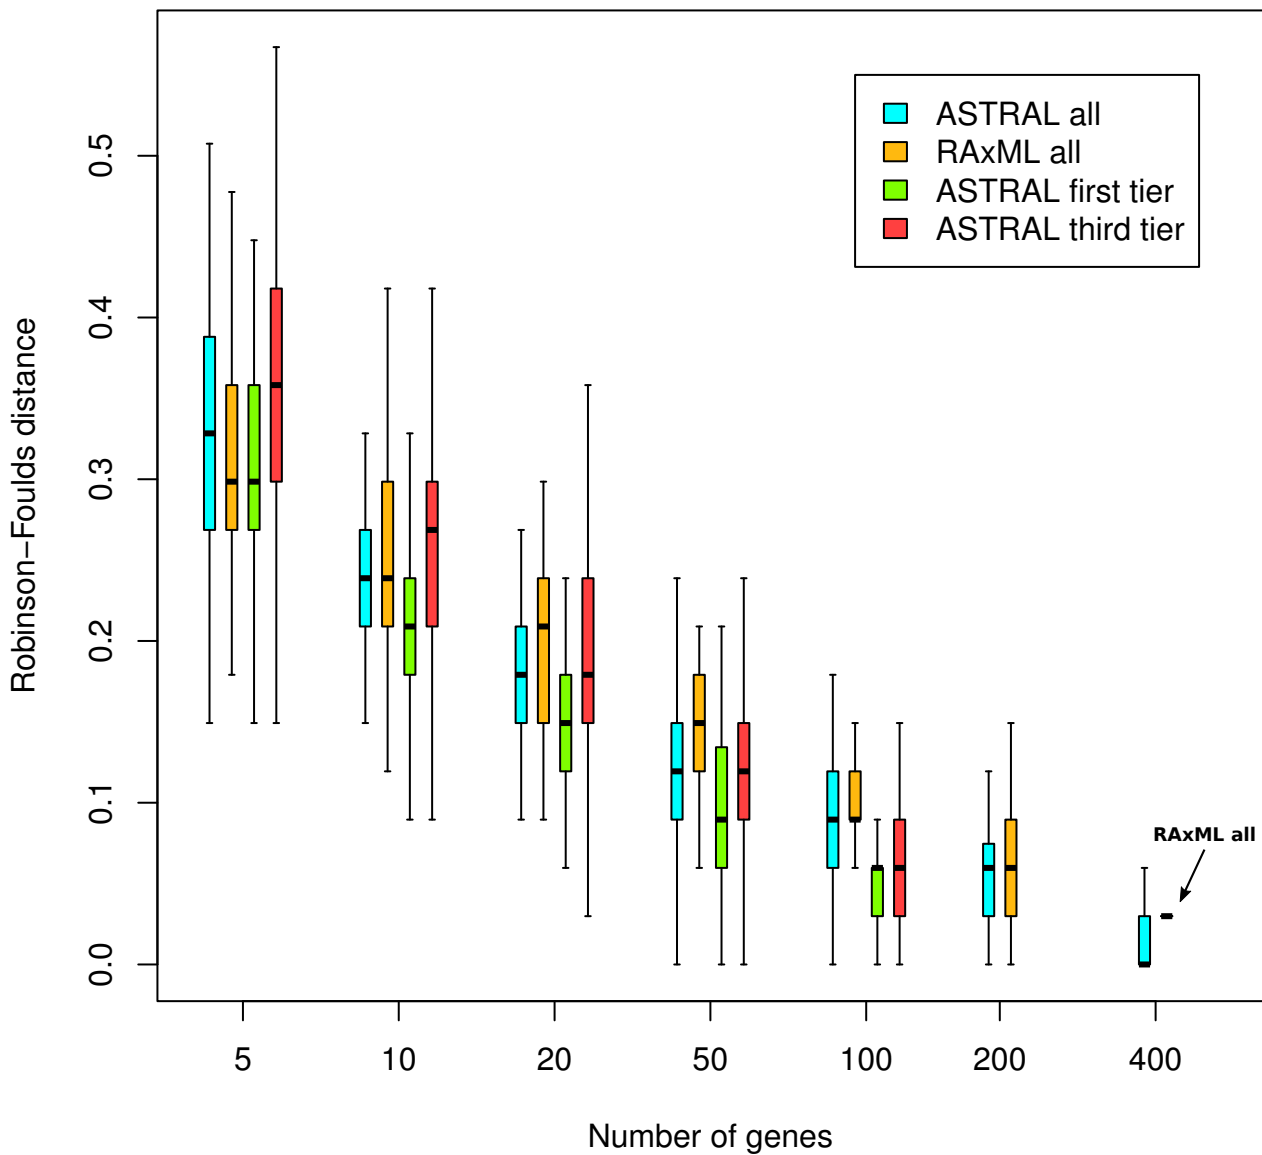

Source: http://www.biorxiv.org/content/10.1101/110296v1.full.pdf
